## Chronotopic Maps in Human Medial Premotor Cortex

Foteini Protopapa<sup>a</sup>, Masamichi J. Hayashi<sup>b,c</sup>, Shrikanth Kulashekhar<sup>a</sup>, Wietske van der Zwaag<sup>d</sup>,  
Giovanni Battistella<sup>e,f</sup>, Micah M. Murray<sup>g,h,i,l</sup>, Ryota Kanai<sup>m,n</sup> and Domenica Bueti<sup>a,\*</sup>

<sup>a</sup> International School for Advanced Studies (SISSA), Trieste, Italy.

<sup>b</sup> Global Center for Medical Engineering and Informatics, Osaka University, Suita, Japan.

<sup>c</sup> School of Psychology, University of Sussex, Brighton, UK.

<sup>d</sup> Animal Imaging and Technology, Ecole Polytechnique Fédérale de Lausanne, Center for Biomedical Imaging (CIBM), Lausanne, Switzerland.

<sup>e</sup> Department of Radiology, Centre Hospitalier Universitaire Vaudois (CHUV), University of Lausanne, Lausanne, Switzerland.

<sup>f</sup> Department of Neurology, Memory and Aging Center, University of California San Francisco, CA, USA.

<sup>g</sup> The Laboratory for Investigative Neurophysiology (The LINE), Department of Radiology and Department of Clinical Neurosciences, University Hospital Center and University of Lausanne, Switzerland.

<sup>h</sup> The EEG Brain Mapping Core, Centre for Biomedical Imaging (CIBM), Lausanne, Switzerland.

<sup>i</sup> The Ophthalmology Service, Fondation Asile des Aveugles and University of Lausanne, Lausanne, Switzerland.

<sup>l</sup> The Department of Hearing and Speech Sciences, Vanderbilt University, Nashville, TN, USA.

<sup>m</sup> Sackler Centre for Consciousness Science, University of Sussex, Brighton, UK.

<sup>n</sup> Araya, Inc., Tokyo, Japan

\*Correspondence to: Prof. Domenica Bueti ([domenica.bueti@sissa.it](mailto:domenica.bueti@sissa.it))

1 **Abstract**

2

3 Time is a fundamental dimension of everyday experiences. We can unmistakably sense its passage  
4 and adjust our behavior accordingly. Despite its ubiquity, the neuronal mechanisms underlying the  
5 capacity to perceive time remains unclear. Here, in two experiments using ultra-high-field 7-Tesla  
6 functional magnetic resonance imaging, we show that in the medial premotor cortex of the human  
7 brain, neural units tuned to different durations are orderly mapped in contiguous portions of the  
8 cortical surface, so as to form chronomaps. The response of each portion in a chronomap is  
9 enhanced by preferred and neighboring durations and suppressed by non-preferred durations  
10 represented in distant portions of the map. These findings identify duration-sensitive tuning as a  
11 neural mechanism underlying the recognition of time and demonstrate for the first time that the  
12 representation of an abstract feature such as time can be instantiated by a topographical  
13 arrangement of duration-sensitive neural populations.

14

## 15 **Introduction**

16

17 Time is a particularly elusive dimension of everyday experiences. We cannot see or touch time;  
18 nevertheless, we clearly sense its flow and adjust our behavior accordingly. When dancing, our  
19 body entrains to the musical tempo. Even without a watch, we can detect when the bus we are  
20 waiting for is late.

21 While a growing body of evidence highlights the contribution of many different brain regions to  
22 temporal computations, the neuronal mechanisms underlying our capacity to perceive time  
23 remains largely unknown[1][2].

24

25 Single-neuron recordings in animals suggest that the encoding of temporal information in the  
26 millisecond/second range is achieved via duration tuned mechanisms[3][4][5]. Duration selective  
27 cells have been observed in cat's early visual cortex[5], in cat's and bat's primary auditory  
28 cortex[6][7], and more recently in the monkey's medial premotor and prefrontal cortices[3][4][8].  
29 In the human brain, the existence of such mechanisms has been recently suggested by  
30 psychophysical studies[9][10] and by a single neuroimaging experiment[11]. Psychophysical  
31 studies show that the repeated presentation of a visual stimulus or an auditory rhythm of a given  
32 duration (i.e., 'adaptor') affects the perceived duration of a subsequent visual stimulus or rhythm  
33 (i.e., 'after-effect'). After-effects are stronger if the temporal distance between the 'adaptor' and  
34 the judged stimulus is optimal, suggesting the existence of tuning profiles[9][10] where the  
35 selectivity is highest for the preferred duration and slowly decays with distance from it. Duration  
36 adaptation has also been shown to influence the activity of the inferior parietal lobule (IPL) in the

37 human brain. Neural activity in the IPL is suppressed for stimuli of the same duration and enhanced  
38 for stimuli of different durations[11].

39

40 However, previous studies, in either the animal or the human brain, have not clarified whether  
41 neurons tuned to different durations have an ordered topographical arrangement in duration-  
42 sensitive areas of the brain. Whether this ordered arrangement is a specific property of a single or  
43 multiple brain regions also remains unknown.

44 Neuronal tuning and topography are mechanisms widely used in the brain to represent sensory  
45 information[12][13], including abstract features like quantities[14]. Showing the existence of a  
46 temporal topography could be therefore very important to clarify the computational architecture  
47 underlying time perception and to link the representation of time to that of other sensory features  
48 like for example stimulus orientation.

49

## 50 **Results**

51

52 To examine if chronotopic representations exist in the human brain, we used ultra-high-field fMRI  
53 at 7T in two distinct experiments. In the first of these experiments (Exp.1) we measured brain  
54 activity while participants (N=11) decided whether the second stimulus (S2) of a pair was longer  
55 or shorter than the first one (S1, see Figure 1A). In this experiment, we used 4 different duration  
56 ranges (i.e., S1 equal to 0.2, 0.4, 0.6 and 1 s). Stimuli were visual gratings (i.e., Gabor patches)  
57 varying in both orientation and duration. Orientation changes were task irrelevant (see Materials  
58 and Methods for details).

59

60 Please Figure 1 here

61

62 **Figure 1** Stimulus sequence and behavioral results of Exp.1. (A). Schematic representation of the stimulus  
63 sequence in a trial of Exp.1. In each trial a standard (S1) and a comparison duration (S2) were presented in  
64 sequence. S1 could be one of four different durations (0.2, 0.4, 0.6, and 1 s). S2 could be either shorter or  
65 longer than S1 (Weber ratio was set to 0.4). Stimuli were sinusoidal Gabor patches varying in orientation.  
66 Orientation changes were task irrelevant. Participants were asked, by pressing one of two response keys, to  
67 judge whether the duration of S2 was shorter or longer than S1. (B) Group average (N=11) of percentage  
68 of accuracy in the time task plotted separately for each of the four durations and as a mean of them ('overall  
69 accuracy', rightmost bar). Error bars are standard errors.

70

71 Behavioral data indicate that participants performed equally well in all tested durations (see Figure  
72 1B). Proportion of correct responses for each S1 duration condition (i.e., 0.2, 0.4, 0.6, and 1 s)  
73 were  $85.1 \pm 7.1$  (mean  $\pm$  standard deviation),  $87.0 \pm 4.9$ ,  $91.5 \pm 5.4$  and  $90.6 \pm 4.1$  %, respectively.  
74 Overall accuracy was  $88.6 \pm 3.7$  %. Although a one-way repeated measures ANOVA with within-  
75 subject factor of S1 durations showed a significant main effect ( $F_{3,30} = 4.824$ ,  $p < 0.05$ ), pair-wise  
76 post-hoc tests showed no significant difference between the different combinations of S1 durations  
77 (all  $p$ 's  $> 0.05$ , Bonferroni-corrected for multiple comparisons).

78

79 For the analysis of Exp.1, we used separate regressors for each of the 4 different duration ranges.  
80 The regressors of our General Linear Model (GLM) modeled the offsets of the first intervals and  
81 were convolved with the canonical hemodynamic response function (HRF). We used event offset  
82 because it was the moment when the duration of a stimulus became available to participants.

83 We first identified the regions associated with the presentation of the four S1 durations together.  
84 As expected from previous neuroimaging findings[15][16], these regions were visual, parietal and  
85 frontal cortices (see Supplementary Figure 1 and Supplementary table 1).

86 We then focused on the identification of the brain regions that were maximally activated for each  
87 specific S1 duration and that clearly showed a topographical arrangement of duration selective  
88 voxels.

89  
90 Figure 2 upper panel shows the group-level significant clusters computed for each of the 4 duration  
91 ranges in the temporal task ( $p_{\text{FWE-cluster level}} < 0.05$ , corrected for multiple comparisons across  
92 the whole brain). Each color codes the cluster of voxels that was classified, according to a winner-  
93 take-all procedure, based on t-statistic maps, as maximally responsive to each of the different  
94 duration ranges. The color scale ranges from red, corresponding to voxels responsive to the  
95 shortest duration (0.2 s), to green, the voxels maximally responsive to the longest duration (1 s).

96  
97 Please Figure 2 here

98  
99 **Figure 2** Group-level fMRI results of Exp.1. Medial and lateral view of the left (L) hemisphere with the  
100 group-level statistical results (N=11) overlaid on the inflated Dartel-11 template. The figure shows the  
101 cluster of vertices (i.e., voxels projected onto the brain surface) classified, according to a winner-take-all  
102 procedure based on statistical t-maps, as maximally responsive to each of the four S1 durations (0.2, 0.4,  
103 0.6, and 1 s). Each color codes a different label; the color scale goes from red (shortest S1) to green (longest  
104 S1). Statistical threshold for t-maps was set to  $p_{\text{FWE}} < 0.05$  cluster level corrected for multiple comparisons  
105 across the whole brain. Duration selective vertices were found in SMA (leftward panel) but also in the

106 Intraparietal Sulcus (IPS) The durations of the colorbar are red= 0.2, orange=0.4, yellow=0.6, and green=  
107 1 s. Legend: PCG= precentral gyrus, CS= central sulcus, A=anterior, P=posterior, L=lateral, M=medial.

108

109 As indicated by the gradual changes of color in Figure 2, we found a topographic organization of  
110 duration sensitive voxels in the supplementary motor area (SMA, see leftward panels) and in part  
111 of the intra-parietal sulcus (IPS) of the left hemisphere (see rightward panels). In SMA, this  
112 progression was in the rostro-caudal direction with voxels sensitive to the shortest duration located  
113 in the anterior premotor cortex and those sensitive to the longest duration in the posterior part.

114 In the IPS the progression was in the lateral-medial direction i.e., voxels maximally responsive to  
115 the shorter duration were closer to the lateral border of the map compared to those sensitive to the  
116 longest duration.

117

118 To quantitatively assess the spatial distribution of duration-selective voxels in SMA and IPS during  
119 the temporal discrimination task we analyzed both volumetric and surface data of each individual  
120 subject (see Materials and Methods for details) and we chose to look at the spatial progression of  
121 the chronomaps by using multiple indexes.

122 At the surface level, for each subject and each duration selective cluster of vertices (i.e., voxels  
123 projected onto the brain surfaces) we calculated the weighted relative distance (wRD) from the  
124 posterior and the lateral border of the chronomap for respectively SMA and IPS (see Materials and  
125 Methods for details). Borders of the maps were identified in each individual subject.

126 Figure 3A shows for the left SMA, the median, the quartile range and the fitted slope of wRD of  
127 the group (for individual data see Supplementary Figure 2).

128

129 Please Figure 3 here

130

131 **Figure 3** Spatial progression of SMA chronomaps in Exp.1. Panel (A) shows for each duration selective  
132 vertex the group median (colored diamonds), the quartile range (vertical bars) and the fitted slope of the  
133 “weighted Relative Distance (wRD)” from the posterior border (P) of the chronomaps. wRD were first  
134 computed for each individual subject on chronomaps overlaid on flattened surfaces in participant’s native  
135 space. The posterior border was chosen to be close the precentral gyrus. (B) weighted centroids (wCntrs)  
136 for duration selective voxels in SMA. 2-D projection of wCntrs in the x-y plane. wCntrs are color-coded  
137 according to duration selectivity. The color scale goes from red (shortest S1=0.2 s) to green (longest S1=1  
138 s). Different colors indicate voxels with different duration selectivity; diamonds with the same color  
139 represent the different subjects (n=11). This last number could change because not all subjects have the full  
140 range of duration selective voxels. (C) Group average of preferred duration (y-axis) of voxels lying at  
141 different distances (x axis RD = relative distance) from the posterior border of the chronomaps. Legend:  
142 P=posterior, wRD =weighted relative distance.

143

144 The plot shows, as expected from the visual inspection of the group-level brain map, that the  
145 distance from the posterior border of the SMA is longer for vertices responsive to the shortest  
146 duration (0.2 s) and becomes progressively shorter for vertices responsive to the longer duration  
147 range. This progression was also present in the majority of the subjects (for individual maps see  
148 Supplementary Figure 2) as revealed by the statistically significant analysis of the wRD slopes  
149 (Wilcoxon test  $p=0.017$ ).

150 To confirm the spatial progression of SMA chronomap, we also identified, for each individual  
151 volumetric map, the duration preferred by the majority of the activated voxels that laid at different  
152 distances from the posterior border of the chronomap (individual chronomaps were parceled in  
153 volumetric bins of 1.5 mm width, for details see Materials and Methods). The relative distance



154 from the posterior border of these preferred durations for the group is shown in Figure 3C. As seen  
155 previously, the shorter the distance from the posterior border, the greater the number of voxels  
156 preferring the longer duration ranges (diamonds in colder colors). The greater the distance from  
157 the posterior border, the greater the number of voxels preferring the short duration ranges  
158 (diamonds in warmer colors). A very similar result is shown in Figure 3B where we plot for each  
159 subject the weighted centroids of each duration selective cluster. Within the SMA, the centroids  
160 of the shortest duration selective cluster (red diamonds) are generally located anteriorly compared  
161 to the centroids of the longest duration selective cluster (green diamonds).

162  
163 In the IPS, the topographical arrangement of voxels (i.e., from lateral to medial for short to long  
164 durations), was apparent at the group level, but it was less consistently observed at the single-  
165 subject level (see Supplementary Figures 3). Indeed only 5 out of 11 subjects showed the  
166 appropriate spatial distribution of duration selective voxels. Moreover, when we looked at the  
167 wRD, there was no statistically significant effect of the slope (Wilcoxon test  $p=0.737$ , see  
168 Supplementary Figure 4).

169  
170 To examine the response tuning of the voxels sensitive to a given duration range, we next looked  
171 at the change of the hemodynamic response of these voxels for preferred and non-preferred  
172 durations. Figure 4 shows the hemodynamic response of duration sensitive voxels for the left  
173 SMA. As shown in panel A, for all duration selective clusters (i.e., colored lines), we observed a  
174 modulation of the presented durations on the BOLD response. Specifically, the hemodynamic  
175 response peaked during the presentation of the preferred duration (PD, see the diamonds in the

176 plot) and slowly decayed for durations distant from the preferred one (PD vs PD $\pm$ 1  $p < 0.03$ ; PD vs  
177 PD $\pm$ 2  $p < 0.002$ ).

178 Similar results were obtained in the IPS (Supplementary Figure 5) where the BOLD response was  
179 enhanced for preferred (PD) and neighboring (PD $\pm$ 1) durations (PD vs PD $\pm$ 1,  $p < 0.009$ ) and  
180 suppressed for durations far (PD $\pm$ 2) from the preferred one (PD vs PD $\pm$ 2  $p < 0.005$ ).

181

182 Please Figure 4 here

183

184 **Figure 4** Duration tuning of Exp.1. (A) Group average of normalized BOLD responses (y axis) of duration  
185 selective voxels (different lines are different duration selective voxels) for preferred and non-preferred  
186 durations. In the x-axis are the 4 presented durations. The BOLD signal in duration selective voxels is  
187 aligned to the presentation timings of the different duration ranges (i.e., 2<sup>nd</sup> volume after S1 offset). The  
188 colored diamonds represent the point in time where the hemodynamic response of duration selective voxels  
189 matched the presentation timing of the appropriate duration (e.g., red-labeled voxels when the shortest S1  
190 duration is presented). The color code is as in Figure 2. (B) Normalized BOLD response to preferred (PD),  
191 neighboring (PD $\pm$ 1) and distant durations (PD $\pm$ 2) averaged across subjects and duration selective voxels.  
192 Error bars are standard errors.

193

194 In order to assess the robustness of Exp.1's results, we ran an additional experiment (Exp.2, N=10)  
195 in which we used a similar temporal discrimination task of visual stimuli (i.e., participants judged  
196 which of the two successive visual stimuli (S1 and S2) lasted for longer time). Visual stimuli were  
197 Gabor patches changing in orientation (see Figure 5A). In Exp.2 we introduced 3 main changes  
198 compared to Exp.1.

199 First, we used a broader range of durations, spanning from 0.2 to 3 s. Second, we used a method  
200 of stimulus presentation that was highly regular, i.e., different durations ranges were presented  
201 sequentially. We used pairs of stimuli (S1 and S2) varying in duration. In different pairs we tested  
202 different duration ranges e.g. S1=0.2 versus S2=0.3s in one pair and S1=0.4 versus S2=0.6 s in a  
203 different pair (see Figure 5A). In each pair we had a standard (T) and a comparison duration  
204 (T+ $\Delta$ T); in half of the trials the standard duration was S1 in the other half it was S2. The pairs were  
205 presented in a sequential manner as to form cycles (i.e. a cycle is a series of trials (N=10) where  
206 we tested 10 duration ranges). In ascending cycles, we progressed from the shortest to the longest  
207 pair of stimuli, in descending cycles it was the opposite.

208 This design allowed us to evaluate whether there was a gradual spatial shift in cortical activation  
209 as the stimulus duration changed.

210 Third, in addition to the temporal discrimination task, participants performed a non-temporal task  
211 in which they judged the spatial orientation of the same visual gratings.

212 This task was included to evaluate the task-dependency of chronotopic representations.

213 In Exp.2, S1 and S2 stimuli were defined by different orientations (see Figure 5A and Materials  
214 and Methods for full details of the tasks). S1 was leftward and S2 was rightward oriented. While  
215 keeping their main orientation, both S1 and S2 slightly changed their angular orientation. In the  
216 temporal task participants judged which stimulus orientation was maintained for longer time,  
217 whereas in the spatial task they judged which orientation underwent the biggest angular change.

218

219 Behavioral data inside the MRI scanner did not reveal any significant performance differences  
220 across the different durations (see Figure 5B, main effect of duration  $F_9 = 1.303$ ,  $p = 0.289$ ) and  
221 the two tasks (main effect of task  $F_1 = 0.309$ ,  $p = 0.592$ , interaction effect:  $F_{1,9} = 0.539$ ,  $p = 0.842$ ).

222

223 Please Figure 5 here

224

225 **Figure 5** Stimulus sequence and behavioral results of Exp.2. (A) Schematic representation of the stimulus  
226 sequence in a trial (Exp. 2). Within a trial, the sequence of orientation changes was fixed and was always  
227 leftward first, rightward second and vertical last. Within the two ‘main orientations’ (left and right) the  
228 grating continuously changed its orientation at a rate of 5 Hz and the range of changes was between 30°  
229 and 45°. Participants were asked to discriminate which of the two ‘main orientations’ (leftward or  
230 rightward) was displayed for longer time (time task) or to judge which one of them underwent the biggest  
231 change (space task). S is standard and C the comparison duration (there were 10 standard durations ranging  
232 from 0.2 to 2 s, in step of 0.2 s). The presentation order of S and C was randomized and counterbalanced  
233 across trials (in half of the trials S1 was a standard, in the other half it was a comparison duration). The  
234 comparison duration was 50% of the standard. The vertical orientation signaled the time to make the  
235 response (by pressing one of two response keys on a keypad) and it was also the inter-trial-interval (1.37  
236 s). (B) Average percentage of accuracy (N=10) in the time and space task plotted separately for each of the  
237 10 pairs of durations and as a mean of them (rightmost plot for time and space tasks). Error bars represent  
238 standard errors.

239

240 At the brain level, based on Exp.1 results, we focused on the identification of chronomaps in both  
241 SMA and IPS (for the details on the two Regions of Interest -ROIs see Material and Methods).

242 Given the cyclical presentation of events in the experimental design, data were analyzed with the  
243 population Receptive Field method (pRF). pRF is an fMRI method of data analysis that is used to  
244 map response selectivity to any type of stimulus feature (e.g. the spatial position of a visual object  
245 [17][18]). The idea behind pRF is that neuronal receptive fields are a form of tuning functions. As  
246 pRF models we used a one-dimensional Gaussian curve with 2 parameters:  $\mu$ , the stimulus duration

247 and  $\sigma$ , the spread of the pRF. For the pRF modelling we used the offset of all S1 durations, no  
248 matter whether S1 was a standard or a comparison duration. This procedure led to the identification  
249 of 17 durations (ranging from 0.2 to 3 seconds). For each time point of the fMRI timeseries the  
250 overlap between the Gaussian tuning models and the presented stimulus profiles were estimated  
251 (see Material and Methods for more details).

252 Figure 6 shows for the group the projection on the cortical surface (medial part of BA6) of the  
253 estimated  $\mu$  parameter. Different colours represent vertices (i.e., voxels projected onto the cortical  
254 surface) selective to different duration ranges (i.e., vertices with different estimated  $\mu$ ).

255

256 Please Figure 6 here

257

258 **Figure 6** pRF Group-level results of Exp.2. Here we show the projection on the cortical surface (medial  
259 part of BA 6) of the estimated  $\mu$  parameter. Different colours represent vertices (i.e., voxels projected onto  
260 the cortical surface) selective to different duration ranges (i.e., vertices with different estimated  $\mu$ ). We  
261 show the results of the group (average of 10 subjects) for the 17 estimated  $\mu$ . The 17  $\mu$  are the 17 durations  
262 presented in the 10 different trial types (S1 duration each time it was either a standard or a comparison  
263 duration). The color scale goes from red i.e., shortest duration (0.2 s) to dark blue i.e., longest duration (3  
264 s). The white lines give an example of the map borders as they were drawn to estimate the weighted  
265 Relative Distance in the individual subjects. On the left-hand side, time maps in time task, on the right-  
266 hand side time maps in the space task. Legend: L=left, R=right, PCG= post central gyrus, SMA=  
267 Supplementary Motor Area, A=anterior, P=posterior.

268

269 As indicated by the gradual changes of color in brain activations shown in Figure 6, we found a  
270 topographic organization of duration sensitive voxels in the left SMA replicating the results of

271 Exp. 1. In addition to the first experiment, here we observed chronotopic maps for a broader range  
272 of durations, in both the left and the right hemisphere and for both temporal and spatial task (see  
273 leftward and rightward panels of Figure 6).

274 As in Exp. 1, this progression was in the rostro-caudal direction within the SMA, with voxels  
275 sensitive to the shorter duration (voxels in warmer colors) located in the anterior and those  
276 sensitive to the longer duration (voxels in colder colors) in the posterior SMA.

277

278 In analogy with Exp.1 we looked at the spatial progression of chromomaps using 3 distinct indexes:  
279 wRD, preferred durations and weighted-centroids (see Materials and Methods for details).

280 Although at a visual inspection (see Figure 6) of the group level results, chronotopic maps seemed  
281 to be present in both hemispheres and for both tasks, the analysis on the wRD revealed that in both  
282 tasks, only vertices of the right hemisphere showed a very clear spatial progression. Indeed, only  
283 in the right hemisphere of both tasks, voxels selective to the longest duration were significantly  
284 closer to the posterior border compared to vertices sensitive to the shorter durations (see Figures  
285 7-8 panel A for the temporal and the spatial task respectively; Wilcoxon test on the wRD slope:  
286 time task, right hemisphere  $p < 0.001$ , left hemisphere  $p = 1$ , space task, right hemisphere  $p < 0.001$ ,  
287 left hemisphere  $p = 1$ ). Indeed, only in the right hemisphere this spatial progression was consistently  
288 present for the majority of the tested subjects (for individual maps see Supplementary Figures 6-  
289 9. For left and right SMA in the temporal task see Supplementary Figures 6 and 7. For the left and  
290 right SMA in the spatial task see Supplementary Figures 8 and 9).

291 This latest result was also reflected in the spatial position of individual centroids (panel B Figures  
292 7 and 8 for temporal and spatial task respectively). For the right hemisphere of both tasks, in the  
293 majority of the tested subjects, the clusters of voxels selective to the shorter durations had centroids

294 located more anteriorly (see the y axis, diamonds in warmer color) with respect to the voxels  
295 responsive to the longer durations (diamonds in colder color). In the both hemispheres there was  
296 no significant difference in the spatial progression (wRD) of the vertices between the two tasks  
297 (temporal vs spatial task: left hemisphere  $p=0.427$ , right hemisphere  $p=0.520$ ).

298 When we considered the preferred durations at the group level, we found for both tasks and both  
299 hemispheres that voxels lying closer to the posterior border of the chronomap preferred the longer  
300 durations, whereas those lying furthest preferred the shortest duration (Panel C Figures 7 and 8 for  
301 time and space task, respectively).

302 Within the IPS, we did not find a clear topography, neither at the group nor at the single subject  
303 level (see Supplementary Figure 10).

304

305 Please Figure 7 and 8 here

306

307 **Figure 7** Spatial progression of left (L) and right (R) SMA chromomaps in Exp.2 during the time task. (A)  
308 show for each duration selective vertex the group median (diamonds), the quartile range (vertical bars) and  
309 the fitted slope of the “weighted Relative Distance (wRD)” from the posterior border (P) of the chromomaps.  
310 wRD were first computed for each individual subject on chromomaps overlaid on flattened surfaces in  
311 participant’s native space. The posterior border was chosen to be close the precentral gyrus. (B) 2D  
312 projection of weighted centroids (wCntrs) in the x-y plane for duration selective voxels in SMA. wCntrs  
313 are color-coded according to duration selectivity. The color scale goes from red (shortest duration 0.2 s) to  
314 dark blue (longest duration 3s). Different colors indicate voxels with different duration selectivity;  
315 diamonds with the same color are the different subjects ( $n=10$ ). This last number could change because not  
316 all subjects have the full range of duration selective voxels. (C) Group average of preferred duration (y-

317 axis) of voxels lying at different distances (x axis RD = relative distance) from the posterior border of the  
318 chronomaps. Legend: P=posterior, wRD =weighted relative distance.

319

320 **Figure 8** Spatial progression of left (L) and right (R) SMA chronomaps in Exp.2 during the space task. (A)  
321 show for each duration selective vertex the group median (diamonds), the quartile range (vertical bars) and  
322 the fitted slope of the “weighted Relative Distance (wRD)” from the posterior border (P) of the chronomaps.  
323 wRD were first computed for each individual subject on chronomaps overlaid on flattened surfaces in  
324 participant’s native space. The posterior border was chosen to be close the precentral gyrus. (B) weighted  
325 centroids (wCntrs) for duration selective voxels in SMA. 2-D projection of wCntrs in the x-y plane. wCntrs  
326 are color-coded according to duration selectivity. The color scale goes from red (shortest duration 0.2 s) to  
327 dark blue (longest duration 3s). Different colors indicate voxels with different duration selectivity;  
328 diamonds with the same color are the different subjects (n=10). This last number could change because not  
329 all subjects have the full range of duration selective voxels. (C) Group average of preferred duration (y-  
330 axis) of voxels lying at different distances (x axis RD = relative distance) from the posterior border of the  
331 chronomaps. Legend: P=posterior, wRD =weighted relative distance.

332

333 To examine the response tuning of duration sensitive voxels, also in this second experiment, we  
334 looked at the variation of the hemodynamic response as a function of the presented duration i.e.,  
335 preferred versus non-preferred durations. Figure 9 shows the normalized hemodynamic response  
336 of SMA duration selective voxels to preferred and neighboring durations (PD and  $PD \pm 1$ , see  
337 darker shades) as opposed to the response to distant durations ( $PD \pm 2$ , see lighter shades). Given  
338 the limited number of repetitions for each of the 17 presented durations, for the plot of the signal  
339 change, we grouped the durations according to the 10 different trial types (i.e., 10 pairs of  
340 durations). The normalized BOLD response is plotted for both the time (upper panel) and the space  
341 task (lower panel). The bar plot shows that for the majority of duration selective voxels activity



342 was enhanced for preferred and neighboring durations and suppressed for more distant durations  
343 (see Figure 9). Since there was no difference in the tuning analysis of left and right hemispheres,  
344 the plot shows the average tuning of left and right SMA.

345

346 Please Figure 9 here

347

348 **Figure 9** Duration tuning of Exp.2. Group average of normalized BOLD responses of duration selective  
349 voxels (colored bars, y axis) for preferred (PD) and neighboring (PD  $\pm 1$ ), durations (PDUPD $\pm 1$ , bars with  
350 darker shades), as opposed to distant non-preferred durations (PD  $\pm 2$ , bars with lighter shades). Asterisks  
351 indicate statistically significant difference at a Wilcoxon rank sum test between PDUPD $\pm 1$  and PD  $\pm 2$  at  
352 \*p<0.01, \*\*p<0.005 and \*\*\*p<0.001.

353 Given the limited number of trials for each of the 17 presented durations, for this plot we grouped the  
354 durations selective voxels according to the 10 different trial type. On the x-axis are the 17 presented  
355 durations grouped in 10 different duration ranges. The BOLD signal in duration selective voxels is aligned  
356 to the presentation timings of the different duration ranges (i.e., 2<sup>nd</sup> volume after S1 offset). The colored  
357 diamonds represent the point in time where the hemodynamic response of duration selective voxels matched  
358 the presentation timing of the appropriate duration (e.g., red-labeled voxels when the shortest range of  
359 duration is presented).

360 **Discussion**

361

362 To summarize, here we showed with two independent data sets and two different paradigms and  
363 methods of data analysis, the existence of neuronal units tuned to different durations in SMA.  
364 Duration selectivity had a clear topographical organization in the rostro-caudal direction for,  
365 respectively, short and long durations. Chronotopic maps were observed across a wide range of  
366 durations (from 0.2 to 3 s) and not only at the group level, but also with a certain degree of  
367 variability at the single-subject level. Figure 10 shows for Exp.1 (panel A) and Exp.2 (panel B)  
368 the SMA chromomaps in two “ideal” subjects i.e., subjects with an anterior-short to-posterior-long  
369 spatial progression. This progression was present in 7 out of 11 subjects in Exp.1 (left SMA) and  
370 in 9 out 10 subjects in Exp.2 (right SMA, see Supplementary Figures 2, 7 and 9 for the SMA maps  
371 of all subjects).

372 Chronotopic maps were also task independent; maps were indeed found when time was available  
373 but it was task irrelevant. At tuning level, we found that the hemodynamic response in duration  
374 selective voxels was enhanced for preferred and neighboring durations and suppressed for  
375 durations far from the preferred one.

376

377 Please Figure 10 here

378

379 **Figure 10** fMRI results, individual data of Exp.1 (A) and Exp.2 (B). (A) For 2 subjects of Exp.1 we show  
380 the left SMA chromomap with the anterior (A) and posterior (P) borders. Individual maps were obtained  
381 using a winner-take-all procedure based on statistical t-maps ( $T > 3.13$ ). We computed 4 different t-maps for  
382 each of the 4 S1 durations ( $p_{\text{FWE-cluster}} < 0.05$ , corrected for multiple comparisons across the whole  
383 brain). For the maps of whole sample (N=11) of subjects see Supplementary Figure 2. (B) For 2 subjects

384 of Exp.2 we show the left and the right SMA chromomap with the anterior (A) and posterior (P) borders in  
385 the time (leftward) and in the space (rightward) task. The maps were the results of a pRF analysis. Here we  
386 show the projection on the cortical surface (medial part of BA 6) of the 17 estimated  $\mu$  parameter. The 17  
387  $\mu$  are the 17 durations presented (S1 when is either the standard or the comparison duration) in the 10  
388 different trial types. Different colours represent vertices selective to different duration ranges (i.e., vertices  
389 with different estimated  $\mu$ ). For the maps of whole sample (N=10) of subjects see Supplementary Figures  
390 6-9.

391

392 Neuronal tuning is an encoding mechanism widely used in neurons to represent sensory and motor  
393 information[13][19] and even more abstract features like quantities[14]. This topographic  
394 organization is thought to have a computational benefit, for example the efficiency of neural  
395 communication[20].

396

397 Duration selective cells have been previously reported in monkeys' medial premotor cortex[3][4].  
398 The present study extends this representational format to humans and shows that duration-selective  
399 units in this region are topographically organized along the anterior-to-posterior axis. Moreover,  
400 while the presence of duration-selective units in monkey's premotor cortex was exclusively  
401 associated with motor timing behavior, our study shows the presence in human premotor cortex of  
402 duration-selective mechanisms in a purely temporal perceptual task.

403

404 In humans, duration selective mechanisms have been recently suggested by an fMRI study  
405 showing duration adaptation effects in the activity of the inferior parietal lobule (i.e., the  
406 Supramarginal Gyrus)[11]. Activity in this region is suppressed when consecutive stimuli have the  
407 same duration.

408 Our data support this finding and show the presence of duration selective mechanisms in a closer  
409 location i.e., the IPS, although in the left rather than the right hemisphere. However, our data go  
410 beyond this previous finding by showing a) the existence of duration selective activity for a wider  
411 range of durations, b) duration selectivity not only in the IPS but also in the SMA and c) most  
412 importantly we showed that only activity in the SMA is topographically organized in a way that  
413 neuronal units selective to similar durations occupy contiguous portion of the cortical surface so  
414 as to form chronomaps.

415

416 Moreover, similarly to the repetition suppression shown by Hayashi and colleagues in the SMG,  
417 the chronomaps in SMA were also present in the spatial task, when time was available but was  
418 task-irrelevant.

419 The presence of topography in SMA, but not in IPS, may indicate that duration selectivity in  
420 different brain regions (IPS and SMA) serves different purposes along the process leading to  
421 duration judgments.

422 Our hypothesis is that duration selective activations in premotor cortex may reflect an active  
423 reconstruction of temporal signals coming from different regions of the brain (e.g. visual or parietal  
424 areas)[21][2][22]. One can think of chronomaps in SMA as a temporal read-out, a later stage of  
425 duration encoding in which duration information becomes finally available and decision-making  
426 takes place. The IPS duration selectivity, which lacks a clear topography [11], may represent an  
427 intermediate stage where duration signals coming from low-level sensory regions are  
428 automatically organized. A support to this hypothesis comes from the observation that the  
429 perturbation of right SMG activity via Transcranial Magnetic Stimulation (TMS) affects time  
430 representations in the SMA[22].

431 Another element, in line with the idea that the duration tuning and topography observed here do  
432 not represent a low-level stage of temporal processing, i.e., something equivalent to sensory maps,  
433 is the anatomical location of the maps. Chronomaps were mainly observed in SMA and neither in  
434 the parietal nor in sensory regions. SMA has been implicated in a variety of timing  
435 tasks[16][23][24] with a range of durations spanning from a few hundreds of milliseconds to a few  
436 seconds[25][26] and with stimuli from different sensory modalities[27][28][29]. It is therefore  
437 likely that this area constitutes an ‘amodal’ and ‘high-level’ core of a timing network in which  
438 duration is represented in an abstract form independent of specific sensory modality or motor  
439 behavior.

440

441 Duration selective units were maximally responsive to the preferred duration, activated by  
442 neighboring durations, and exhibited the strongest suppression to durations distant from the  
443 preferred one. This seems to suggest a Gaussian-like type of response profile, where neuronal units  
444 tuned to similar durations have overlapping tuning curves. This tuning profile is also in line with  
445 the behavioral effects obtained with duration adaptation paradigms where an optimal proximity  
446 between “adaptor” and test duration leads to stronger repulsive effects[9]. In analogy with spatial  
447 vision or audition (e.g. visual orientation[13] or auditory pitch[30]), the tuning profiles observed  
448 here may serve the function of enhancing the discriminability of durations by suppressing the  
449 activity for different durations.

450

451 In summary, here we found a topographic representation of time in human premotor cortex, an  
452 area that has been previously identified as “time” region. Our findings of chronomaps clarify the

453 nature of duration information represented there and, most importantly, indicate duration tuning  
454 and topography as possible mechanisms for duration read-out.

455

## 456 **Materials and Methods**

457

### 458 *Subjects*

459 We tested a total of twenty-one healthy volunteers, eleven in Exp.1 (5 females, mean age 23.7  
460 years, SD 4.3 years) and ten in Exp.2 (9 females, mean age 27.7 years, SD 5.1 years) with normal  
461 or corrected-to-normal vision. All volunteers gave written informed consent to participate in this  
462 study, the procedures of which were approved by the ethics committee of the Faculty of Biology  
463 and Medicine at the University Hospital of Lausanne.

464

### 465 *Stimuli and Procedure*

466 In Exp.1, we used a temporal discrimination task of visual durations. Visual stimuli were  
467 sinusoidal Gabor patches (100% contrast, spatial frequency of 1.9 cycles/degree, Gaussian  
468 envelope with standard deviation of 2.2 degrees, diameter of ~9 degree) with a circular hole  
469 (diameter 0.6 degrees, at the center of the Gabor) displayed at the center of the screen around a  
470 central fixation spot (a black disk 0.5 degrees of diameter at a viewing distance of 90 cm) on a  
471 grey background. In each trial, two Gabor patches (S1 and S2) were sequentially presented with a  
472 variable inter-stimulus-interval ranging between 4 and 5.2 s in 0.08 s steps. The two stimuli were  
473 followed by a response cue i.e. a red fixation spot of 2 s duration (see Figure 1A). S1 and S2 varied  
474 in orientation and duration, although only duration was task relevant. The duration of S1 could be  
475 0.2, 0.4, 0.6, and 1 s and its orientation 36, 72, 108, and 144 degrees. S2 could be either shorter or

476 longer in duration than S1. The duration of S2 was longer or shorter by a constant Weber ratio of  
477 0.4 (e.g. if S1 was 0.2 s, S2 was either 1.6 or 3.6 s), whereas the orientation of S2 was a value  
478 randomly chosen from the 4 possible orientations used for S1 (i.e., 36, 72, 108, or 144 degrees).  
479 The combination of duration and orientation lead to 16 different types of S1 stimuli. Each stimulus  
480 type for S1 was presented only once in each fMRI run.

481 Participants were asked to judge whether the duration of S2 was shorter or longer than S1.  
482 Participants made their responses by pressing one of two buttons on a response-pad. They used  
483 their right index finger to express the choice “S2 shorter than S1” and their right middle finger for  
484 the “S2 longer than S1” responses. Participants were instructed to be as accurate as possible (no  
485 emphasis was put on reaction times) and to fixate at the center of the screen while performing the  
486 duration discrimination task. They were also requested to ignore the orientation changes of the  
487 stimulus and to not use counting strategies to estimate duration.

488 Each fMRI run contained 16 trials and the total duration of each run was 3 min and 51 s. We  
489 collected 18 fMRI runs in two separate sessions (9 runs per session). The second session was  
490 performed 1–3 days after the first session. The data of this first experiment are partially shared  
491 with another study that is currently under review (Hayashi et al.).

492

493 In Exp. 2, two tasks were used: a temporal discrimination and an orientation discrimination task.  
494 The stimuli and the task structure were identical in the two tasks; the only difference was the  
495 stimulus feature participants were asked to attend (duration versus orientation). The stimulus was  
496 a sine wave grating (size = 400 by 400 pixels, 8.01 degree of visual angle at viewing distance of  
497 90 cm; spatial frequency was 0.05 cycle/pixel), drifting at a speed of 1 cycle per second and  
498 displayed at varying angular orientations. Within a trial the sequence of orientation changes was

499 fixed and was always leftward first, rightward second and vertical last (Figure 1C). Within the two  
500 ‘main orientations’ (leftward - rightward) the grating continuously changed its orientation at a rate  
501 of 5 Hz (an orientation change each 0.2 s) and the range of changes was between 30° and 45°. The  
502 amount of time the grating maintained its ‘main’ orientation defined a temporal interval. During  
503 the temporal discrimination task, participants judged which of the two ‘main orientations’  
504 (leftward or rightward) was maintained for a longer time. In the orientation discrimination task  
505 participants judged which of the two ‘main orientations’ underwent the biggest change. In this  
506 manner, the physical stimuli were identical and the amount of attention paid to them was equated  
507 across tasks, the only difference was the instruction given to the participants (attend to duration  
508 versus attend to orientation changes). The vertical orientation signaled the time to make the  
509 response (by pressing one of two response keys on a keypad) and it was also the inter-trial-interval.  
510 The duration of the vertical orientation was kept constant (1.37 s), whereas the duration of the two  
511 ‘main orientations’ varied.

512 On each trial there was always a standard (T) and a comparison duration (T+ $\Delta$ T). The duration of  
513 the comparison was a constant proportion of the standard (i.e., 50% of the standard, Weber ratio  
514 was equal to 0.50). The presentation order of standard and comparison (i.e., standard first,  
515 comparison second or vice-versa) was randomized and counterbalanced across trials. Half of the  
516 times S1 was a standard and the other half it was a comparison duration. We used 10 different  
517 standard durations, ranging from 0.2 to 2 s in steps of 0.2 s, one for each trial. The full combination  
518 of standards and comparisons resulted in following 10 pairs of durations 1: 0.2-0.3 s, 2: 0.4-0.6 s,  
519 3: 0.6-0.9 s, 4: 0.8-1.2 s, 5: 1.0-1.5 s, 6: 1.2-1.8 s, 7: 1.4-2.1 s, 8: 1.6-2.4 s, 9: 1.8-2.7 s, 10: 2.0-3.0  
520 s.



521 While the grating was displayed for a standard and a comparison duration, its angular orientation  
522 changed at a rate of 5 Hz. The angular change was one of 12 pseudo-randomly chosen values  
523 ranging from 30° to 45° (in logarithmic steps, base 10). It is worth emphasizing here that since the  
524 orientation changes were chosen pseudo-randomly, sometimes the same orientation could be  
525 displayed more than once (maximum number of allowed repetitions of the same orientation was  
526 3). Therefore, the number of orientation changes was not entirely predictive of the duration of the  
527 stimulus.

528 The differences between rightward and leftward orientation could be 5°, 7°, 9° or 11°. We chose  
529 these different values based on the results of a purely behavioral pilot study where we tested both  
530 temporal and orientation discrimination tasks. The angular differences chosen were those leading  
531 to discrimination accuracy similar to the temporal task.

532 Both tasks were structured in ‘ascending’ and ‘descending’ cycles. Each cycle comprised 10 trials  
533 and lasted 44 s. ‘Ascending’ cycles started with the shortest duration pair (i.e., 0.2-0.3 s, first trial)  
534 and ended with the longest pair (i.e. 2-3 s, the tenth trial). On descending cycles, it was the reverse  
535 (i.e. the first trial had the longest and the tenth the shortest pair). The time interval between cycles  
536 was 2.03 s; during this interval the grating was in vertical orientation. In both tasks subjects were  
537 responding using either the index or the middle finger of their right hand. In each fMRI run there  
538 were 10 cycles. There were separate runs for ‘descending’ and ‘ascending’ cycles (1 run each) and  
539 for the temporal and the orientation discrimination tasks (2 runs each). Each participant thus  
540 performed a total of 4 fMRI runs (220 fMRI volumes each).

541

542 *Behavioral Data Analysis*

543 In Exp.1 for each participant we took the percentage of performance accuracy for the four different  
544 S1 durations and we entered these values in a one-way repeated measures ANOVA.

545 In Exp.2 for each participant we took the percentage of performance accuracy for the 10 different  
546 duration pairs in the two tasks and submitted them to a task (time, space)  $\times$  durations (10 durations  
547 pairs) within subject ANOVA.

548 For both experiments the alpha level was set to 0.05. As post-hoc test we used the Bonferroni test.

549

### 550 *MRI Acquisition and Analyses*

#### 551 MRI Acquisition

552 The mapping of the selectivity of the neural responses necessitated high spatial resolution of the  
553 functional data. The increased signal-to-noise ratio and available BOLD associated with ultra-high  
554 magnetic field systems ( $>3$  T) allowed the use of smaller voxel sizes in fMRI[31]. In addition, the  
555 spatial specificity of the BOLD signal is improved because the signal strength of venous blood is  
556 reduced due to a shortened relaxation time, restricting activation signals to cortical gray matter[31].  
557 Therefore, we employed high-resolution, 7T fMRI for the functional maps.

558

559 In both experiments blood oxygenation level-dependent (BOLD) functional imaging was  
560 performed using an actively shielded, head-only 7T MRI scanner (Siemens, Germany), equipped  
561 with a head gradient-insert (AC84, 80 mT/m max gradient strength; 350 mT/m/s slew rate) and  
562 32-channel receive coil with a tight transmit sleeve (Nova Medical, Massachusetts, USA).

563

564 In Exp.1 time-course series of 169 volumes were acquired for each run using the 3D-EPI-CAIPI  
565 sequence[32]. The spatial resolution was 2.0 mm isotropic, the volume acquisition time was 1368

566 ms, the flip angle was 14 degrees, the repetition time (TR) 57 ms and the echo time (TE) 26 ms  
567 and the bandwidth 2774 Hz/Px. The matrix size was 106 x 88 x 72, resulting in a field of view of  
568 210 (AP) x 175 (RL) x 144 (FH) mm. An undersampling factor 3 and CAIPIRINHA shift 1 were  
569 used. Slices were oriented transversally with the phase-encoding direction left-right. 42x45  
570 reference lines were acquired for the GRAPPA reconstruction. For each individual, a total of 3,042  
571 volumes (169 volumes per run, 18 runs) were analyzed.

572 High-resolution whole-brain MR images were also obtained using the MP2RAGE pulse sequence  
573 optimized for 7T[33] (voxel size = 1.0 x 1.0 x 1.0 mm, matrix size 256 x 256 x 176,  $T_1/T_2$   
574 =750/2350ms,  $\alpha_1/\alpha_2 = 4/5$  degrees,  $TR_{MP2RAGE}/TR/TE = 5500/6.5/2.84$  ms).

575

576 In Exp. 2 fMRI data were acquired with a continuous EPI pulse sequence with sinusoidal read-out  
577 ( $1.5 \times 1.5$  mm in-plane resolution, slice thickness = 1.5 mm, TR = 2000 ms, TE = 25 ms, flip angle  
578 =  $47^\circ$ , slice gap = 1.57 mm, matrix size =  $148 \times 148$ , field of view  $222 \times 222$  mm, 40 oblique  
579 slices covering most of occipital, parietal and premotor regions). In each fMRI run we acquired  
580 220 fMRI volumes. A T1-weighted high-resolution 3D anatomical image (resolution =  $1 \times 1 \times 1$   
581 mm, TR = 5500 ms, TE = 2.84 ms, slice gap = 1 mm, matrix size =  $256 \times 240$ , field of view =  $256$   
582  $\times 240$ ) was acquired for each subject using the MP2RAGE pulse sequence. For each participant  
583 an additional whole-brain EPI image (a single volume with 80 slices and TR=4000ms and  
584 otherwise identical parameters to the functional data) was acquired in order to aid the co-  
585 registration between the EPI images and the individual MP2RAGE. The EPI sequence used in  
586 Exp.2 did not allow whole-brain coverage. Based on the results of Exp.1, we chose to place the 6-  
587 cm thick imaging slab so as to cover the occipital, parietal and premotor cortices.

588

589 fMRI Analyses

590

591 fMRI Preprocessing

592 For both experiments, functional imaging data were preprocessed using the statistical parametric  
593 mapping toolbox (SPM12, Wellcome Department of Imaging Neuroscience, University College  
594 London). In Exp. 1 the EPI volumes acquired in each session were realigned to the mean of the  
595 session and then co-registered to the T1-weighted image acquired in the same session. In order to  
596 perform group level analysis (see Figure 2) the realigned and co-registered images were then  
597 normalized to the averaged DARTEL template (diffeomorphic anatomical registration through  
598 exponentiated lie algebra[34]) and smoothed with a 2 mm full-width at half-maximum Gaussian  
599 kernel. To perform surface-based analysis, data were kept in the subject's space i.e., after  
600 realignment and co-registration to the T1-weighted image data were then directly smoothed with  
601 a 2 mm full-width at half-maximum Gaussian kernel (Figures 3A and 4).

602

603 In Exp. 2 the EPI volumes acquired in each session were slice time corrected, realigned to the  
604 mean of the session and then co-registered first to the whole brain EPI image and subsequently to  
605 the T1-weighted image acquired in the same session. Since the sequence used for Exp.1 was a 3D-  
606 EPI-CAIPI (i.e., the whole k-space was acquired at once, with no time lags), only in Exp.2 data  
607 were slice time corrected. In order to performed volumetric analyses and to visualize the group-  
608 level pRF results a DARTEL temple was also created for Exp.2.

609

610 General Linear Model (GLM) Analysis

611 Exp.1 data were analyzed using a GLM approach. The fMRI time series were first analyzed in  
612 each single subject. Each single subject model included 18 runs/session with 6 event-types in each  
613 session. These comprised the 4 different S1 durations (each event was time-locked to the offset of  
614 S1), a fifth event time locked to the onset of S2 (comparison duration) and a sixth event time-  
615 locked to the onset of the participants' response. The linear models included also the motion  
616 correction parameters as effects of no interest. The data were high-pass filtered (cutoff frequency  
617 = 0.0083 Hz). In order to see brain activity correlated to the different S1, for each subject we  
618 estimated 4 contrasts, one for each S1. These contrasts also averaged parameter estimates across  
619 the 18 runs.

620 In order to test the existence of chromomaps in the group, the four contrast images estimated in  
621 each subject, were then entered into a second-level ANOVA where we performed again 4 different  
622 contrasts (one for each S1 duration). The statistical threshold was set to  $p < 0.05$  FWE cluster-  
623 level corrected for multiple comparisons across the entire brain volume (cluster size estimated at  
624 a voxel level threshold  $p$ -uncorrected = 0.001).

625 Correction for non-sphericity[35] was used to account for possible differences in error variance  
626 across conditions and any non-independent error terms for the repeated-measures.

627 To appreciate the existence of chromomaps, the 4 t-maps, obtained either at single subject or at  
628 group level were then used to classify the voxels according to their preference to one of the 4  
629 different duration ranges. Voxels were classified according to a “winner take all” rule, for example  
630 voxels with the greatest t value (threshold was set to  $T > 3.13$ ) for the shortest duration range (0.2  
631 s) were classified as responsive to that duration range and labeled with number 1. We created 4  
632 different labels and each label was associated with a specific color for visualization purposes.

633

## 634 pRF Analysis

635 Data from Exp.2 were analyzed using the Population Receptive Field method (pRF). The pRF  
636 analysis was performed with the SamSrf toolbox for pRF mapping  
637 ([https://figshare.com/articles/SamSrf\\_toolbox\\_for\\_pRF\\_mapping/1344765/22](https://figshare.com/articles/SamSrf_toolbox_for_pRF_mapping/1344765/22)).

638 This toolbox implements a method of analysis similar to the one used in several  
639 studies[14][17][18][36]. We performed the pRF analysis on two distinct ROIs: BA6 and IPS. The  
640 ROIs were based on the Freesurfer software's Brodmann and Destrieux atlases.  
641 (<http://surfer.nmr.mgh.harvard.edu/>). For each subject the pRF analysis was performed on slice-  
642 time corrected, realigned, co-registered and smoothed images.

643 The idea behind pRF is that neuronal receptive fields are a form of tuning functions that reflect  
644 specific stimulus properties. For each subject pRFs were modeled as one-dimensional Gaussians  
645 with 2 parameters:  $\mu$ , the stimulus duration and the spread of the pRF,  $\sigma$ . For the pRF modelling  
646 we used the offset of all S1 durations, no matter whether S1 was a standard or a comparison  
647 duration. This procedure led to the identification of 17 durations (i.e., 0.2, 0.3, 0.4, 0.6, 0.8, 0.9, 1,  
648 1.2, 1.4, 1.5, 1.6, 1.8, 2, 2.1, 2.4, 2.7, 3.0 s). For each time point (i.e. each TR) of our fMRI  
649 timeseries and each vertex of the ROIs, the method estimates the overlap between the Gaussian  
650 tuning model of a given  $\mu$  and the presented durations. A coarse-to-fine optimization approach  
651 then determined the optimal pRF parameters for which the goodness-of-fit of the predicted time  
652 series to the observed data was maximized. The maps shown are the projection on the cortical  
653 surface of the estimated optimum  $\mu$  parameter. Different colors represent vertices (i.e., voxels  
654 projected onto the cortical surface) selective to different duration ranges.

655 For the group-level analysis, the pRF maps for each participant were morphed into a common  
656 DARTEL template using the morph labels feature of the MNE software (<https://mne->

657 [tools.github.io/dev/index.html](https://tools.github.io/dev/index.html)). MNE performs the morphing between subjects using the spherical  
658 surfaces provided by Freesurfer.

659

## 660 Visualization

661 For visualization of the group and of the single subject fMRI results in both experiments we  
662 inflated either the DARTEL template (group level results) or the single subject T1-weighted image  
663 (individual results) using the FreeSurfer pipeline (<http://surfer.nmr.mgh.harvard.edu/>). To  
664 reconstruct surfaces for the DARTEL template, the gray matter and white matter images of the  
665 template were combined into a single image with two distinct values assigned to the gray matter  
666 and white matter voxels. The combined images were treated as a skullstripped T1-weighted image  
667 and submitted to the Freesurfer pipeline for surface reconstruction.

668

## 669 Quantification of the spatial distribution of chromomaps

### 670 Surface-based approach

671 In order to better appreciate the spatial distribution of the chromomaps at the individual level, we  
672 identified chromomaps in each single subject by using either the single-subject SPM t-maps (Exp.1)  
673 or the pRF maps (Exp.2). The surface-based analyses were performed on images in the subject's  
674 space.

675

676 For a better visualization, these volumetric maps were projected onto the cortical surface of each  
677 individual brain. Individual cortical surfaces were reconstructed following the Freesurfer pipeline  
678 via segmentation of different brain tissues (projection fraction was set to 0.5).

679 Individual chromomaps were identified in left SMA and left IPS for Exp.1 and left and right SMA,  
680 and left and right IPS for Exp.2. In Exp.1, we used anatomical landmarks (i.e., identification of  
681 the pre, post-central gyri and intra-parietal sulcus) to make sure that chromomaps at single subject  
682 level matched the location of those observed at group level.

683 For Exp.2 the identification of the chromomap at single subject level was easier since the pRF  
684 analysis was performed on 2 distinct ROIs: BA6 and IPS. For the identification of SMA  
685 chromomap we took only the medial part of the BA6.

686

687 For each map we created a surface-ROI (left SMA and left IPS for Exp.1 and left, right SMA and  
688 left, right IPS for Exp.2) and we manually draw its borders. According to the spatial progression  
689 of the maps (from short to long duration-selective voxels) observed at group level, we identified  
690 an anterior and a posterior border for SMA maps and a medial and a lateral border for IPS. Those  
691 borders were then used as cuts to flatten the surfaces and became the outer edges of the flattened  
692 surfaces. For SMA we took the postcentral gyrus as anatomical landmark for drawing the posterior  
693 border.

694

695 For each duration selective vertex and each ROI, we calculated the weighted Relative Distance  
696 (wRD) from one of the borders of the map ( $D_1$ ). This border, arbitrarily chosen, was the posterior  
697 for SMA map, and the lateral for the IPS map.

698 In more detail, the weighted Relative Distance from  $D_1$  border was computed as following:  $wRD =$

699  $\frac{\sum_{i=1}^{Nvd} w * RD}{Nvd}$ , where  $w$  is the weight of each vertex defined as the ratio between clustered duration-

700 selective vertices ( $Nbrs$ ) and the total number of vertices maximally responsive to a given duration



701 ( $Nvd$ ) i.e.,  $w = Nnbrs/Nvd$ . Whereas  $RD$  was the ratio between the distance from one of the  
702 borders ( $D_1$ ) and the mean distance between the two borders ( $TD$ )  $RD = D_1/TD$ .

703 For each map we computed the  $wRD$  of each duration selective vertex and we identified a slope  
704 of the spatial progression of those vertices. The individual slopes were used to perform a Wilcoxon  
705 test in order to check the statistical significance of the spatial progression of the maps.

706

707 Volume-based approach

708 To make sure that the results from the surface-based analyses depicted reality and were not the  
709 product of wrong projection of voxels onto the surface, we also performed volume-based analyses.

710 The analyses on the volume were performed on data normalized to the Dartel space i.e., Dartel-11  
711 (Exp. 1) and Dartel-10 (Exp. 2). Similarly to surface based analysis, also here we identified for  
712 each experiment and each subject chronomaps in SMA and IPS.

713 Also, for volumetric maps we defined maps' borders. These were anterior and posterior for SMA,  
714 and medial and lateral for IPS.

715

716 In order to check whether the duration selective voxels followed the same spatial progression as  
717 the surface-maps, we identified for each subject and each map the "preferred duration" of different  
718 portions of the map. More precisely, we binned the individual volumetric ROIs in parallel planes  
719 of 1.5 mm width. Within each volumetric-bin the "preferred duration" was calculated as the  
720 duration the majority of activated voxels responded to. Thus, for each subject, we had a sequence  
721 of preferred durations between the two borders of the map. We then decided to compute the  
722 average of preferred durations across subjects. Since different subjects had sequences of preferred  
723 durations of different length, we decided to proceed as follow: we calculated for each spatial bin

724 its relative distance from one border (D1) of the map (i.e., posterior for SMA and lateral for IPS).  
725 Then for each map we created a single sequence of “preferred durations”, which included the  
726 sequences of all subjects ordered according to their relative distance from D1. In order to reduce  
727 the total length of this long sequence, we averaged every five values of the sequence. The result  
728 of this procedure is displayed in panel C of Figures 3, 7 and 8.

729 In order to appreciate the spatial distribution of the maps at single subject level, for each subject  
730 and each duration-selective cluster of voxels we also estimated the “weighted Centroids” (wCntrs).  
731 Within a cluster of duration selective voxels, every voxel was assigned a weight based on the  
732 number of neighboring voxels with the same duration selectivity. This means that clustered voxels  
733 had more weight than sparse ones. The wCntrs were then calculated by taking into account the  
734 position of all duration-selective voxels within a cluster but each position was represented as many  
735 times as the weight assigned to a specific voxel. This measure allowed us to visualize in a single  
736 graph the central position of all duration selective clusters in all subjects (see panel B, Figures 3,  
737 7 and 8).

738

### 739 Tuning Analysis

740 To check the response properties of duration selective voxels we looked at the BOLD response to  
741 preferred and non-preferred durations. In both experiments, for each subject and each cluster of  
742 duration selective voxels within the different chronomaps (i.e., SMA and IPS in the left hemisphere  
743 for Exp.1 and left and right SMA for Exp.2), we looked at the normalized hemodynamic response  
744 to preferred and non-preferred durations.

745 The normalization was performed as follow:  $BOLD(t) = \frac{\sum_{i=1}^{N_{runs}} \sum_{v=1}^{N_{voxels}} \frac{x(t)-MB}{MB}}{\text{std}(\sum_{v=1}^{N_{voxels}} \frac{x(t)-MB}{MB})}$

746

747 where  $t$  is the signal in a given voxel and MB is the baseline obtained averaging the signal of  $t$   
748 across runs. Normalization was then performed subtracting the signal in a given voxel from a  
749 baseline value and dividing it by the baseline. The BOLD response was aligned to the 2<sup>nd</sup> volume  
750 (i.e., a TR) after the offset of the S1 duration. Within a single subject, we first averaged the BOLD  
751 signal across the voxels of a cluster and then across the fMRI runs.

752

### 753 **Acknowledgments**

754

755 Financial support has been provided by the European Research Council -ERC (Grant Agreement  
756 No 682117 BiT-ERC-2015-CoG to D.B.), the Swiss National Science Foundation (Grants  
757 #3100B0-133136 and 320030\_149982 to M.M.M.), the Japan Science and Technology Agency  
758 (JST to R.K) and JSPS Postdoctoral Fellowships for Research Abroad and Research Fellowships  
759 for Young Scientist (to M.J.H). We would like to thank Dr. Mayur Narsude for supporting data  
760 collection.

761

762

### 763 **Author Contributions**

764

765 RK and DB conceived the study; WvdZ, DB, MJH collected the data; FP, SK, RK, GB, and DB  
766 analyzed the data; RK, FP, MJH, MMM, WvdZ, and DB wrote the paper.

767 **References**

1. Merchant H, Harrington DL, Meck WH. Neural Basis of the Perception and Estimation of Time. *Annu Rev Neurosci.* 2013/06/04. 2013; doi:10.1146/annurev-neuro-062012-170349
2. Buonomano D V, Maass W. State-dependent computations: spatiotemporal processing in cortical networks. *Nat Rev Neurosci.* 2009/01/16. 2009;10: 113–125. doi:nrn2558 [pii]10.1038/nrn2558
3. Mita A, Mushiake H, Shima K, Matsuzaka Y, Tanji J. Interval time coding by neurons in the presupplementary and supplementary motor areas. *Nat Neurosci.* 2009;12: 502–507.
4. Merchant H, Perez O, Zarco W, Gamez J. Interval tuning in the primate medial premotor cortex as a general timing mechanism. *J Neurosci.* 2013/05/24. 2013;33: 9082–9096. doi:10.1523/JNEUROSCI.5513-12.201333/21/9082 [pii]
5. Duysens J, Schaafsma SJ, Orban GA. Cortical off response tuning for stimulus duration. *Vision Res.* 1996;36: 3243–3251.
6. He J, Hashikawa T, Ojima H, Kinouchi Y. Temporal integration and duration tuning in the dorsal zone of cat auditory cortex. *J Neurosci.* 1997;17: 2615–2625.
7. Galazyuk A V, Feng AS. Encoding of sound duration by neurons in the auditory cortex of the little brown bat, *Myotis lucifugus*. *J Comp Physiol A.* 1997;180: 301–311.
8. Jin DZ, Fujii N, Graybiel AM. Neural representation of time in cortico-basal ganglia circuits. *Proc Natl Acad Sci U S A. National Academy of Sciences;* 2009;106: 19156–61. doi:10.1073/pnas.0909881106
9. Heron J, Aaen-Stockdale C, Hotchkiss J, Roach NW, McGraw P V, Whitaker D. Duration channels mediate human time perception. *Proc Biol Sci.* 2011/08/13. 2012;279: 690–698. doi:rsfpb.2011.1131 [pii]10.1098/rsfpb.2011.1131
10. Becker MW, Rasmussen IP. The rhythm aftereffect: support for time sensitive neurons with broad overlapping tuning curves. *Brain Cogn.* 2007;64: 274–281.
11. Hayashi MJ, Ditye T, Harada T, Hashiguchi M, Sadato N, Carlson S, et al. Time Adaptation Shows Duration Selectivity in the Human Parietal Cortex. Zatorre R, editor. *PLOS Biol. Public Library of Science;* 2015;13: e1002262. doi:10.1371/journal.pbio.1002262
12. Decharms RC, Zador A. Neural representation and the cortical code. *Annu Rev Neurosci.* 2000;23: 613–647.
13. Hubel DH, Wiesel TN. Receptive fields, binocular interaction and functional architecture in the cat's visual cortex. *J Physiol.* 1962;160: 106–154.
14. Harvey BM, Klein BP, Petridou N, Dumoulin SO. Topographic Representation of

- Numerosity in the Human Parietal Cortex. *Science* (80- ). 2013;341: 1123–1126.
15. Wiener M, Turkeltaub P, Coslett HB. The image of time: A voxel-wise meta-analysis. *Neuroimage*. 2010;49: 1728–1740. doi:10.1016/j.neuroimage.2009.09.064
  16. Coull JT, Vidal F, Nazarian B, Macar F. Functional anatomy of the attentional modulation of time estimation. *Science* (80- ). 2004;303: 1506–1508.
  17. Dumoulin SO, Wandell BA. Population receptive field estimates in human visual cortex. 2007; doi:10.1016/j.neuroimage.2007.09.034
  18. Schwarzkopf DS, Anderson EJ, De Haas B, White SJ, Rees G. Behavioral/Cognitive Larger Extrastriate Population Receptive Fields in Autism Spectrum Disorders. 2014; doi:10.1523/JNEUROSCI.4416-13.2014
  19. Georgopoulos AP, Schwartz AB, Kettner RE. Neuronal population coding of movement direction. *Science* (80- ). 1986;233: 1416–1419.
  20. Chen BL, Hall DH, Chklovskii DB. Wiring optimization can relate neuronal structure and function. *Proc Natl Acad Sci U S A*. 2006;103: 4723–4728.
  21. Salvioni P, Murray MM, Kalmbach L, Bueti D. How the Visual Brain Encodes and Keeps Track of Time. *J Neurosci*. 2013;33: 12423–12429.
  22. Wiener M, Klotz D, Turkeltaub PE, Hamilton RH, Wolk DA, Coslett HB. Parietal influence on temporal encoding indexed by simultaneous transcranial magnetic stimulation and electroencephalography. *J Neurosci*. Society for Neuroscience; 2012;32: 12258–67. doi:10.1523/JNEUROSCI.2511-12.2012
  23. Bueti D, Walsh V, Frith C, Rees G. Different brain circuits underlie motor and perceptual representations of temporal intervals. *J Cogn Neurosci*. 2008/02/16. 2008;20: 204–214. doi:10.1162/jocn.2008.20017
  24. Bueti D, Macaluso E. Auditory temporal expectations modulate activity in visual cortex. *Neuroimage*. 2010/03/20. 2010;51: 1168–1183. doi:S1053-8119(10)00293-4 [pii]10.1016/j.neuroimage.2010.03.023
  25. Morillon B, Kell CA, Giraud AL. Three stages and four neural systems in time estimation. *J Neurosci*. 2009;29: 14803–14811.
  26. Lewis PA, Miall RC. Brain activation patterns during measurement of sub- and supra-second intervals. *Neuropsychologia*. 2003;41: 1583–1592.
  27. Rao SM, Harrington DL, Haaland KY, Bobholz JA, Cox RW, Binder JR. Distributed neural systems underlying the timing of movements. *J Neurosci*. 1997;17: 5528–5535.
  28. Coull JT, Nazarian B, Vidal F. Timing, storage, and comparison of stimulus duration engage discrete anatomical components of a perceptual timing network. *J Cogn Neurosci*.

2008;20: 2185–2197.

29. Pastor MA, Day BL, Macaluso E, Friston KJ, Frackowiak RS. The functional neuroanatomy of temporal discrimination. *J Neurosci*. 2004;24: 2585–2591.
30. Regan D, Tansley BW. Selective adaptation to frequency-modulated tones: Evidence for an information-processing channel selectively sensitive to frequency changes. *J Acoust Soc Am*. Acoustical Society of America; 1979;65: 1249–1257. doi:10.1121/1.382792
31. van der Zwaag W, Francis S, Head K, Peters A, Gowland P, Morris P, et al. fMRI at 1.5, 3 and 7 T: characterising BOLD signal changes. *Neuroimage*. 2009/05/19. 2009;47: 1425–1434. doi:S1053-8119(09)00500-X [pii]10.1016/j.neuroimage.2009.05.015
32. Narsude M, Gallichan D, van der Zwaag W, Gruetter R, Marques JP. Three-dimensional echo planar imaging with controlled aliasing: A sequence for high temporal resolution functional MRI. *Magn Reson Med*. 2016;75: 2350–2361. doi:10.1002/mrm.25835
33. Marques JP, Kober T, Krueger G, van der Zwaag W, Van de Moortele PF, Gruetter R. MP2RAGE, a self bias-field corrected sequence for improved segmentation and T1-mapping at high field. *Neuroimage*. 2009/10/13. 2010;49: 1271–1281. doi:S1053-8119(09)01073-8 [pii]10.1016/j.neuroimage.2009.10.002
34. Ashburner J. A fast diffeomorphic image registration algorithm. *Neuroimage*. 2007/09/01. 2007;38: 95–113. doi:S1053-8119(07)00584-8 [pii]10.1016/j.neuroimage.2007.07.007
35. Friston KJ, Glaser DE, Henson RN, Kiebel S, Phillips C, Ashburner J. Classical and Bayesian inference in neuroimaging: applications. *Neuroimage*. 2002;16: 484–512.
36. Van Dijk JA, De Haas B, Moutsiana C, Schwarzkopf DS. Intersession reliability of population receptive field estimates. *Neuroimage*. 2016;143: 293–303. doi:10.1016/j.neuroimage.2016.09.013

**A**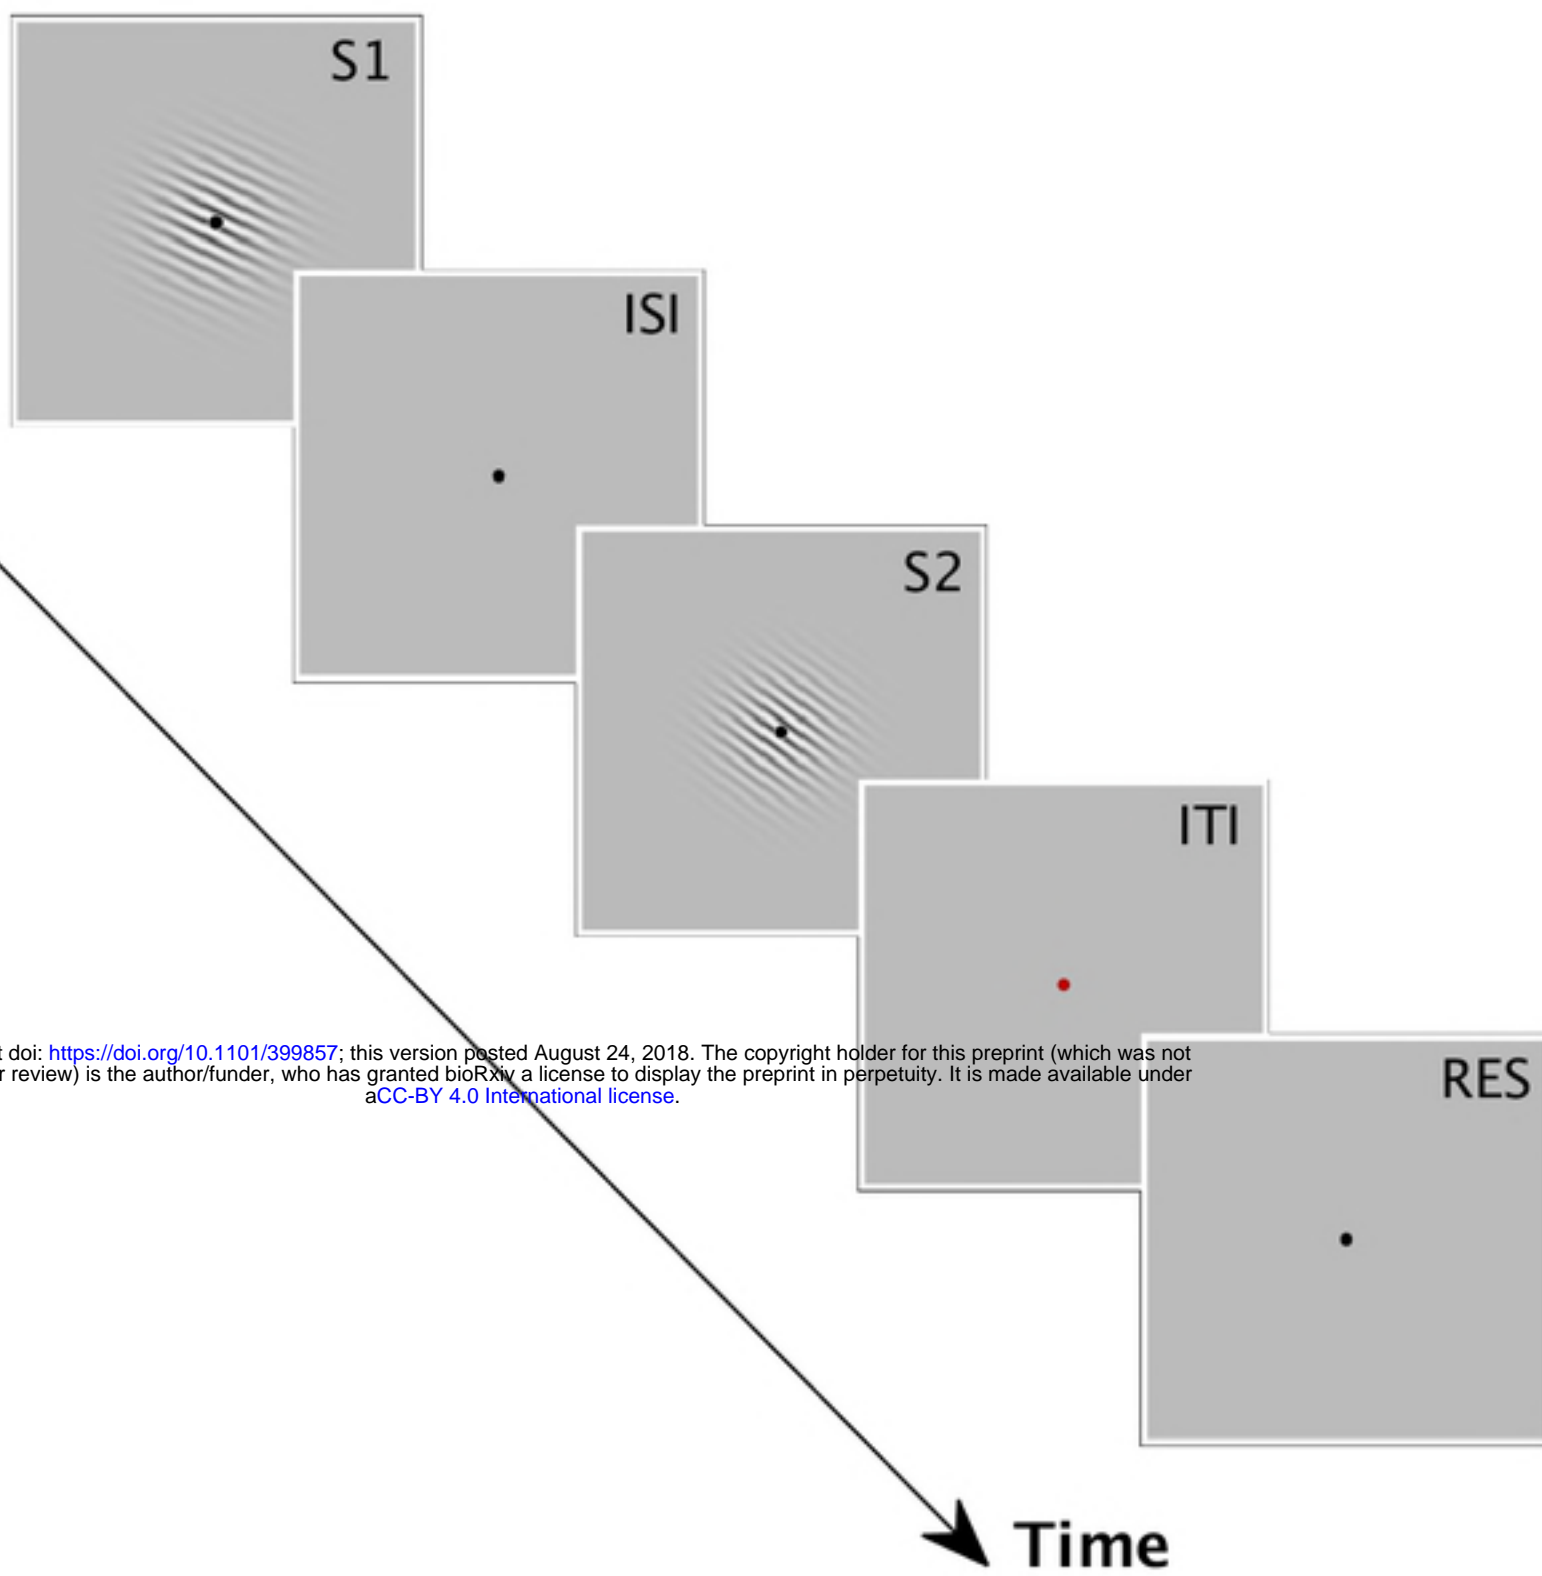**B**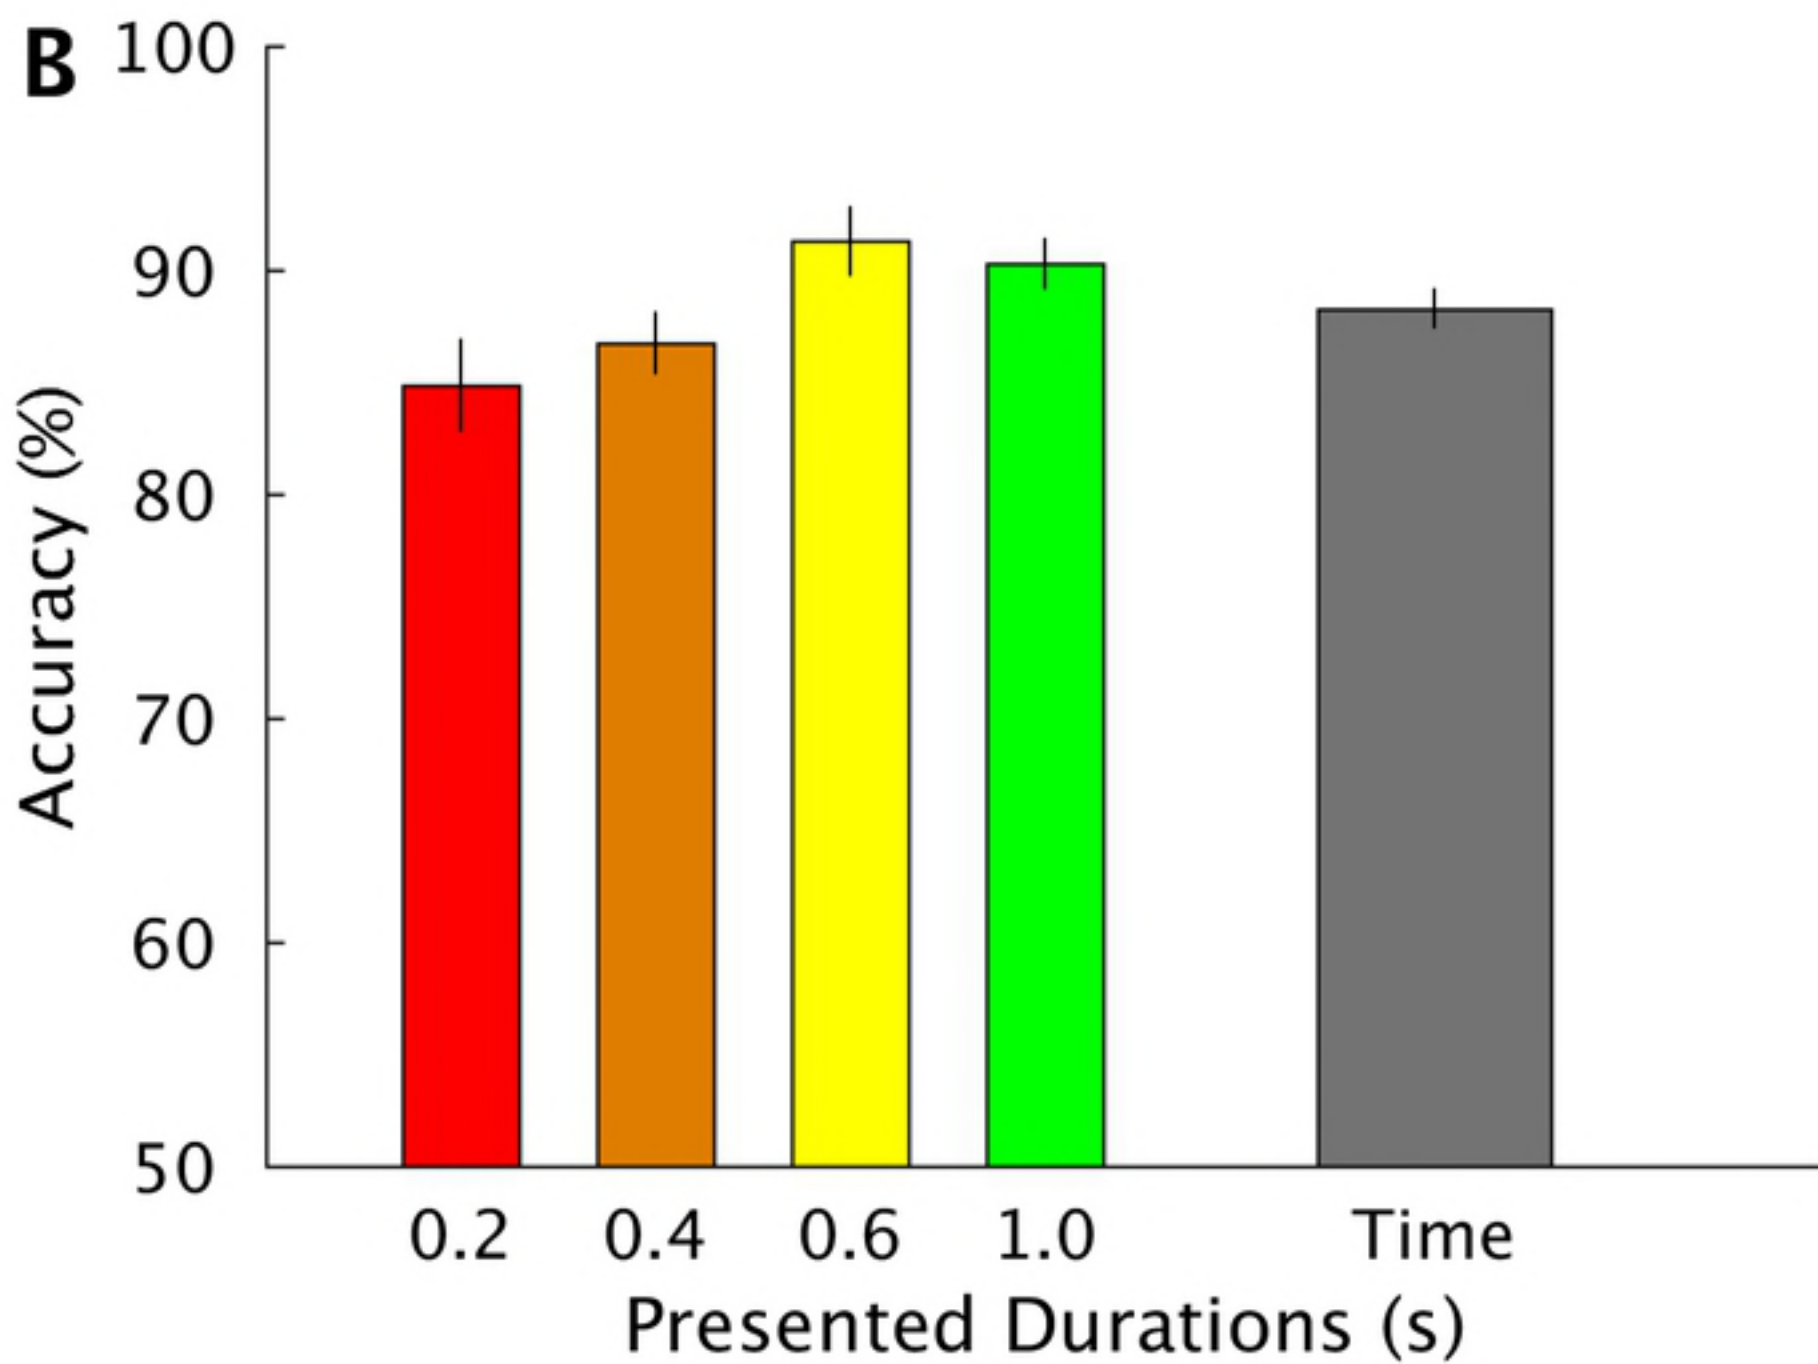

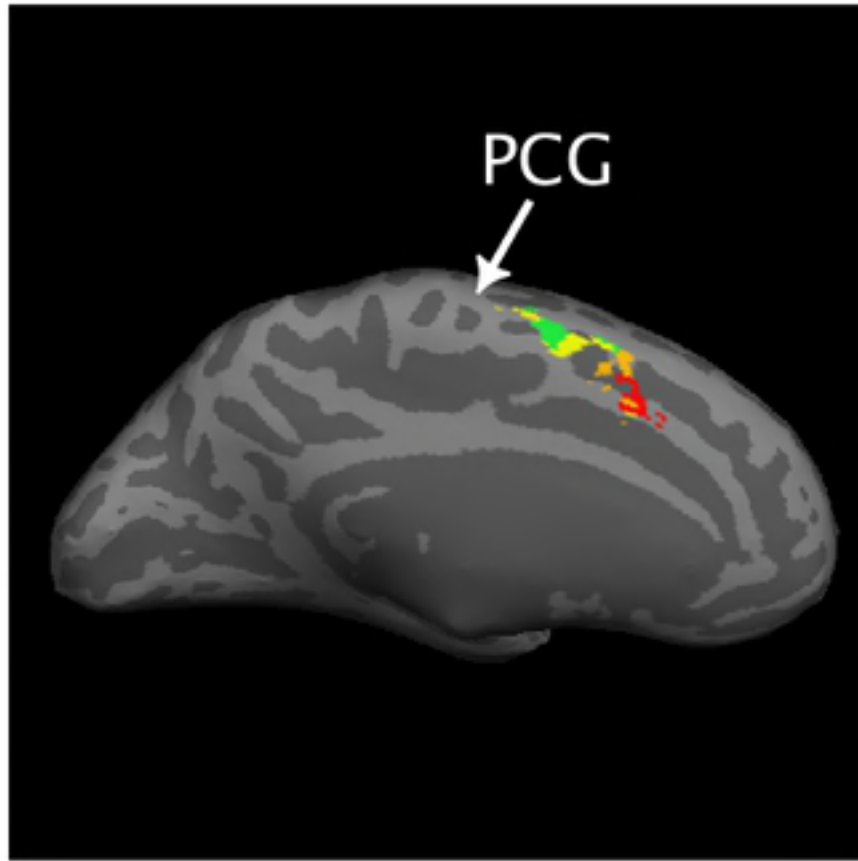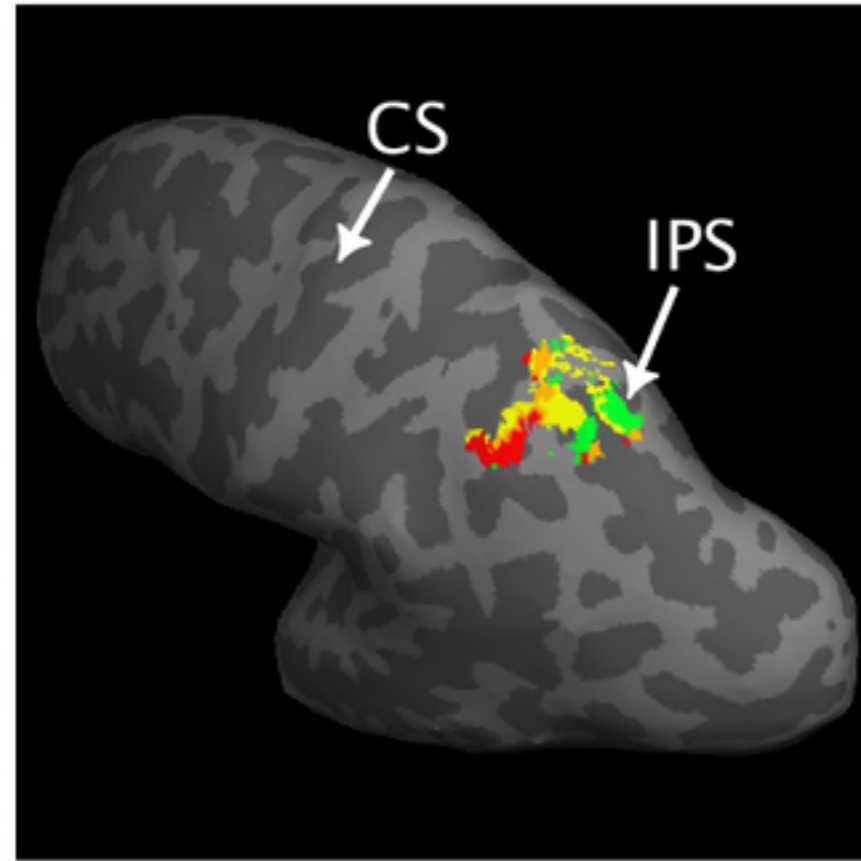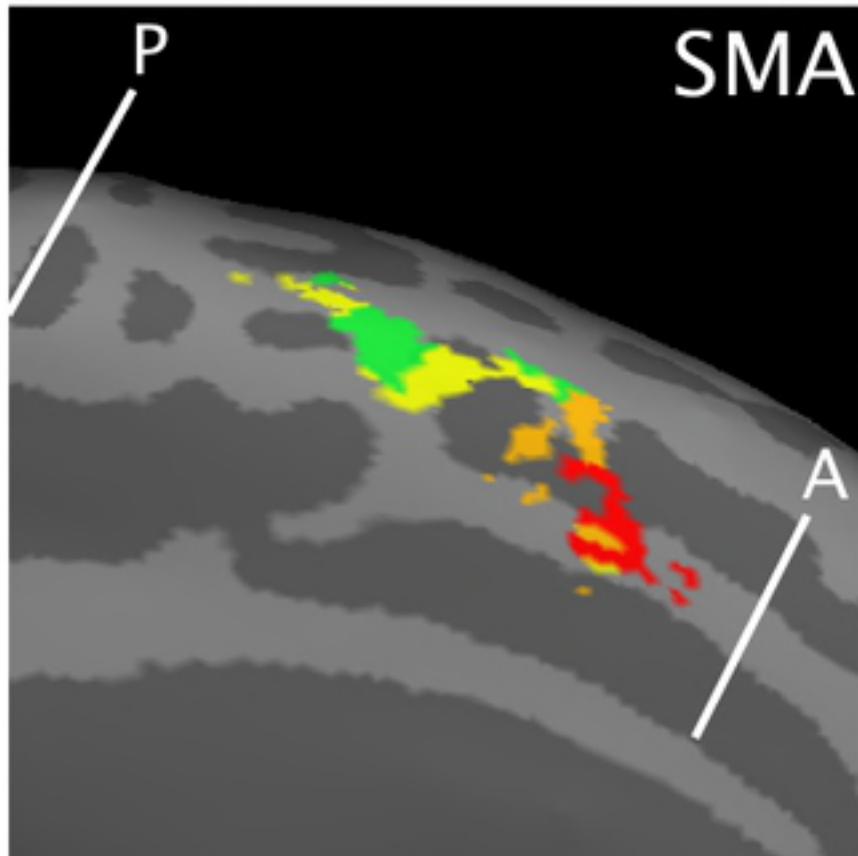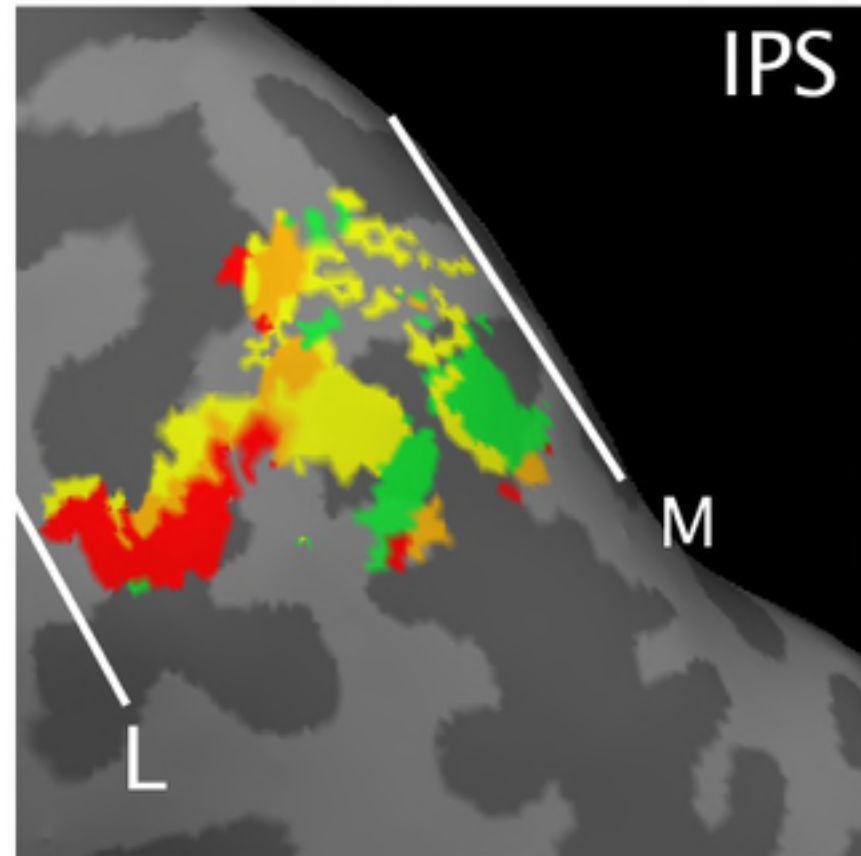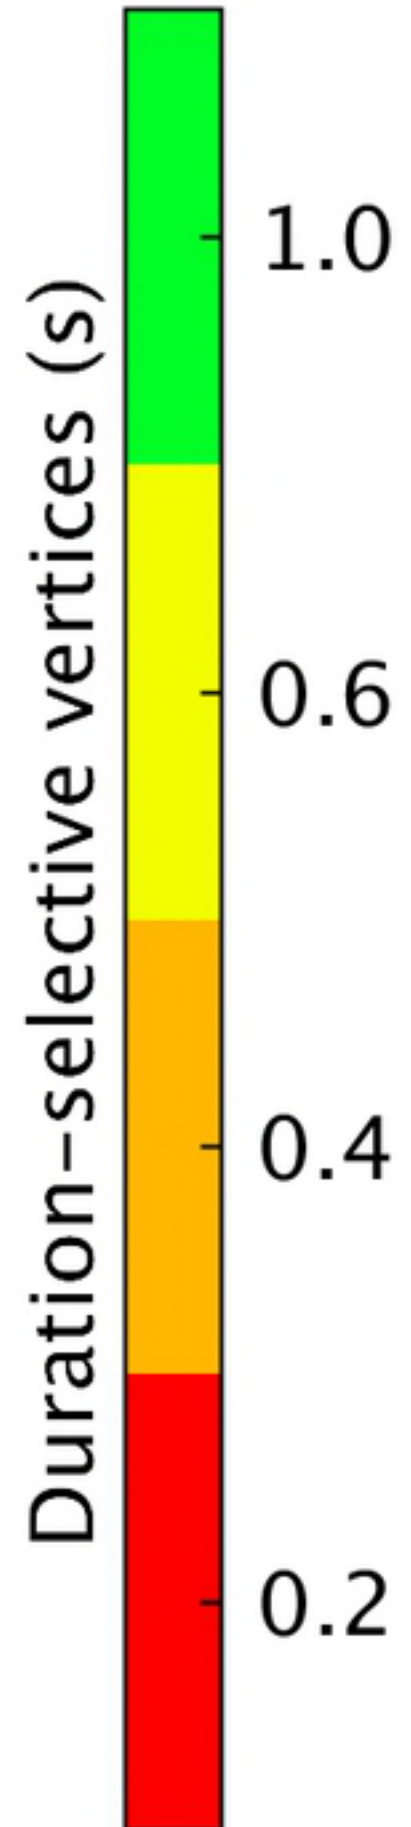



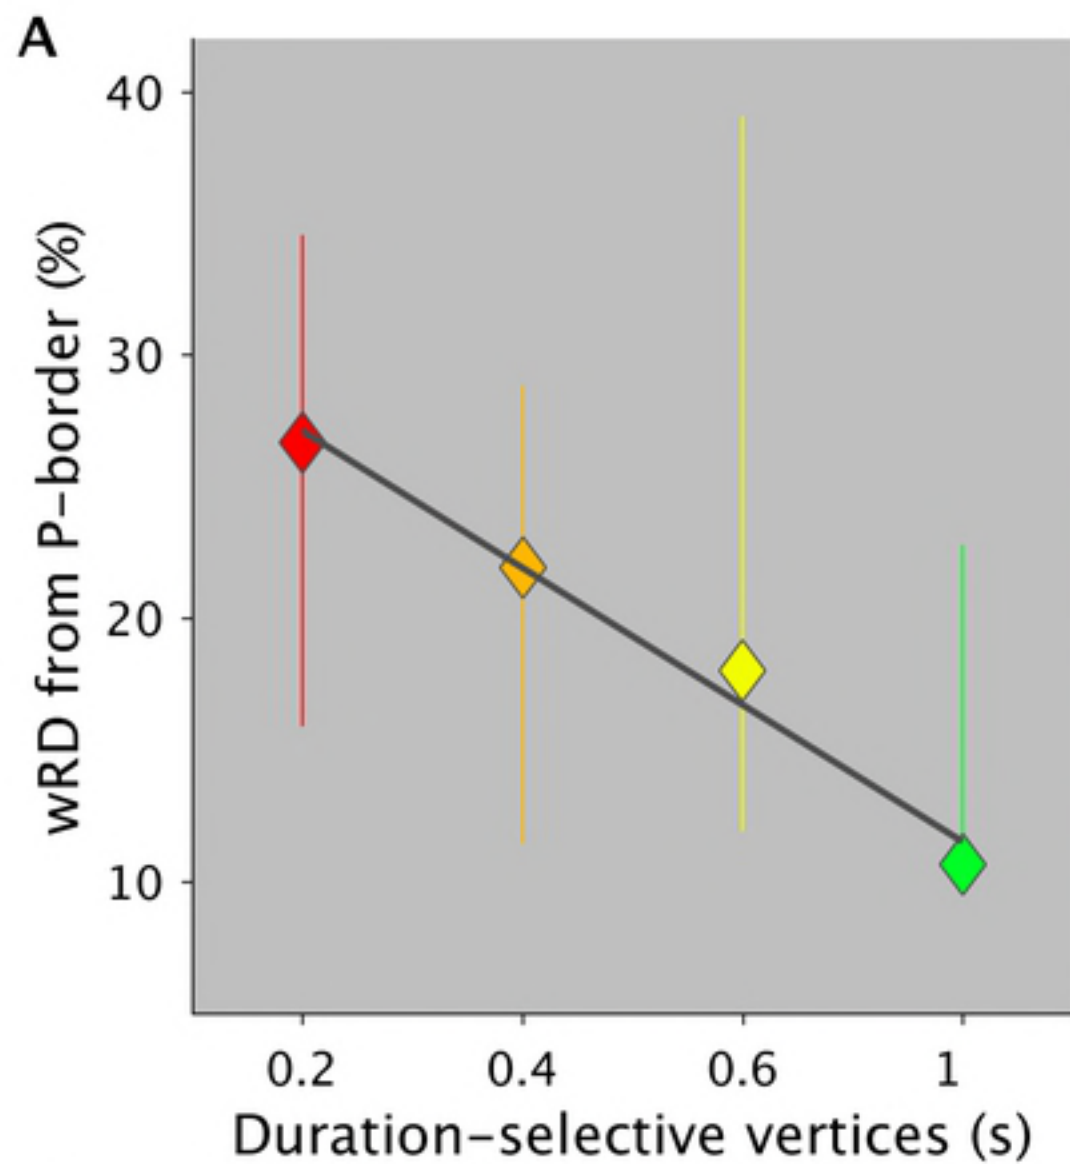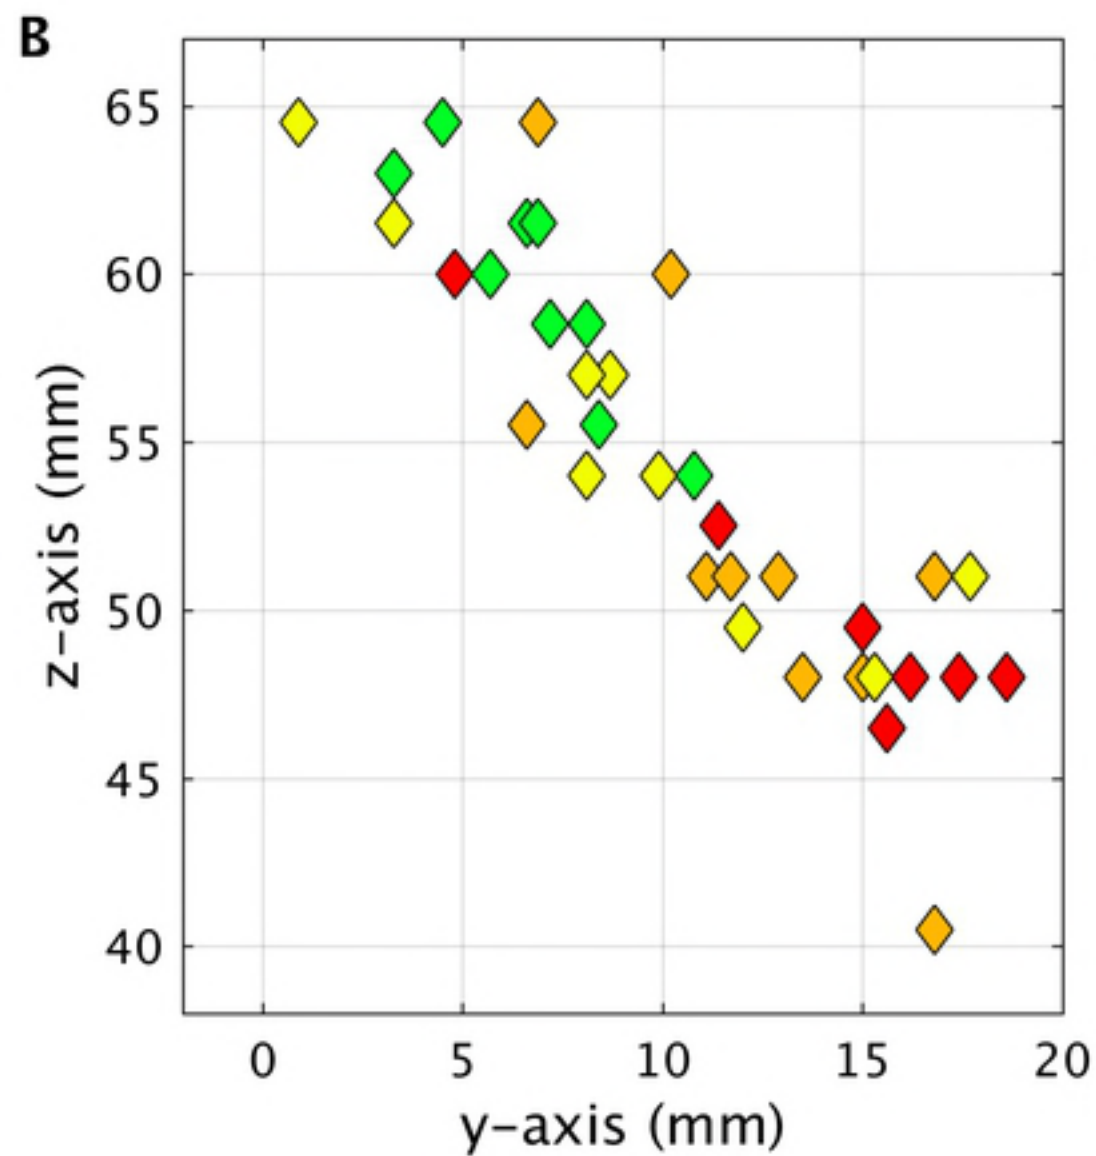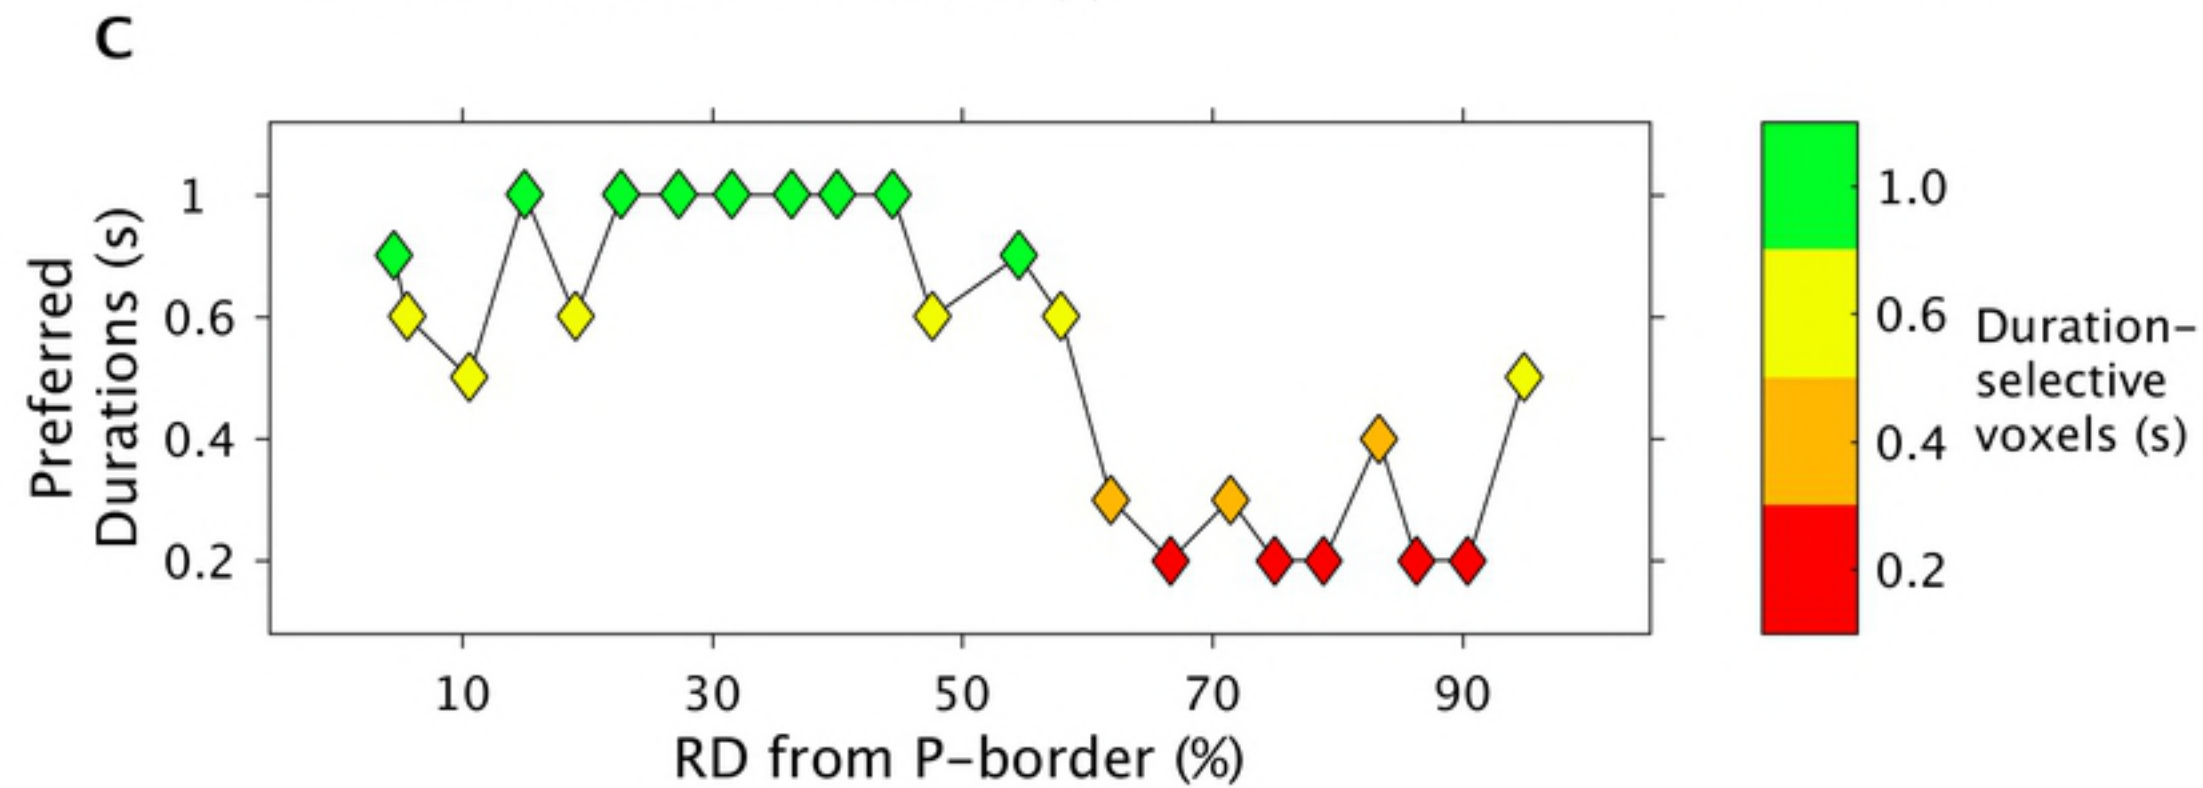

Duration-selective voxels (s)

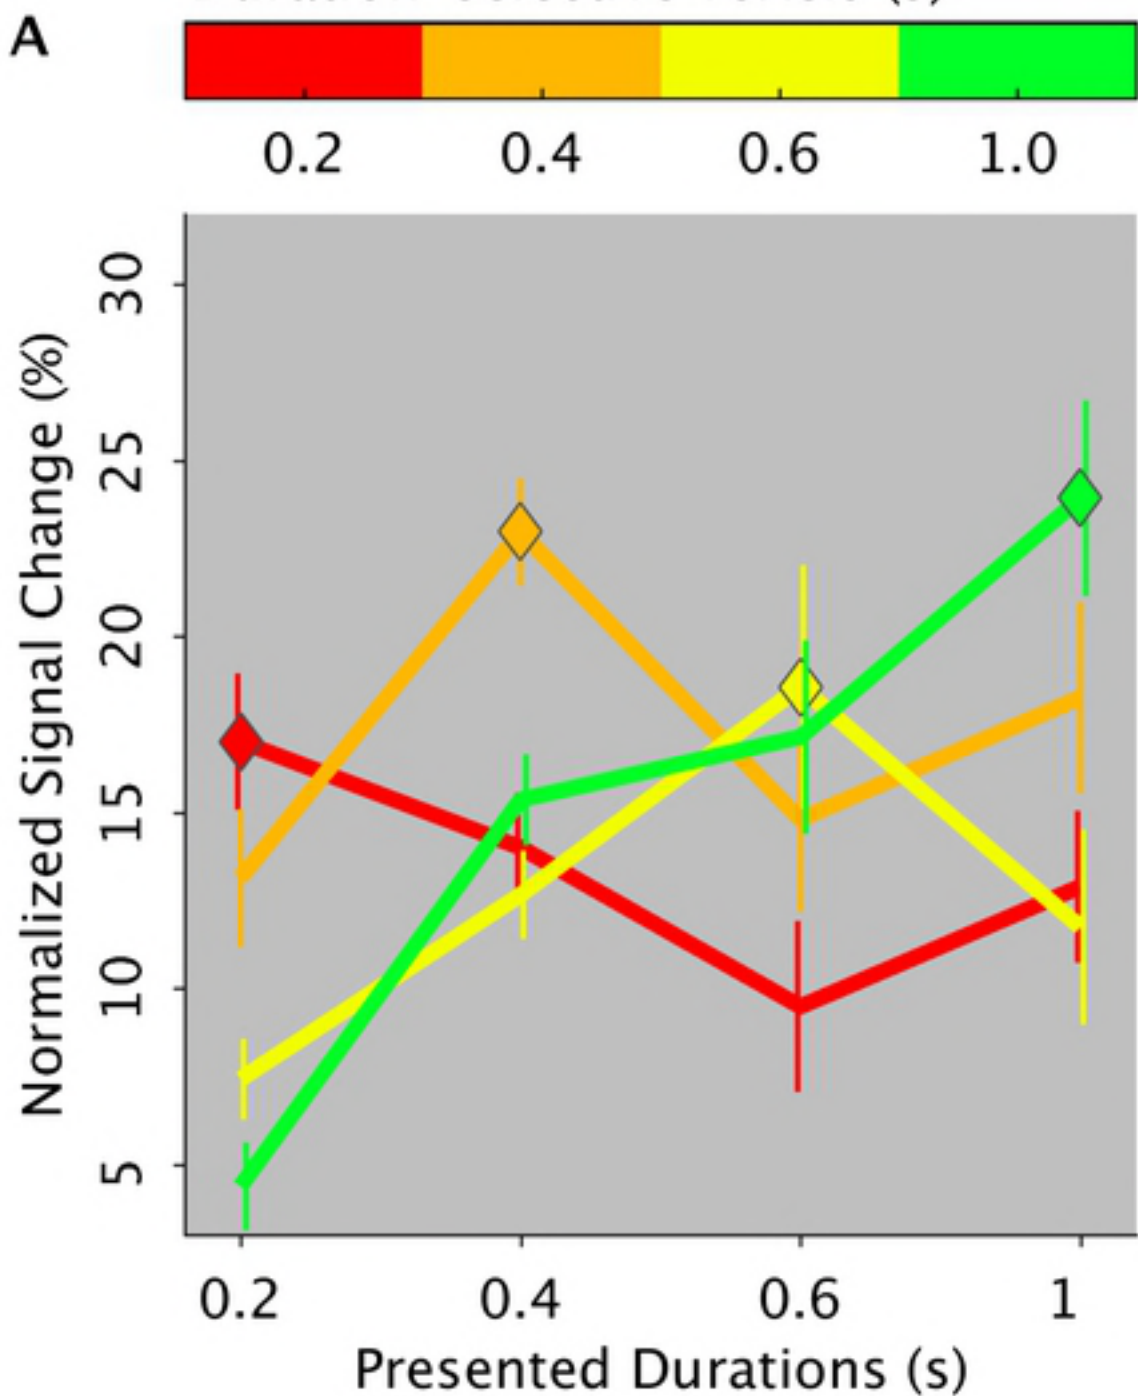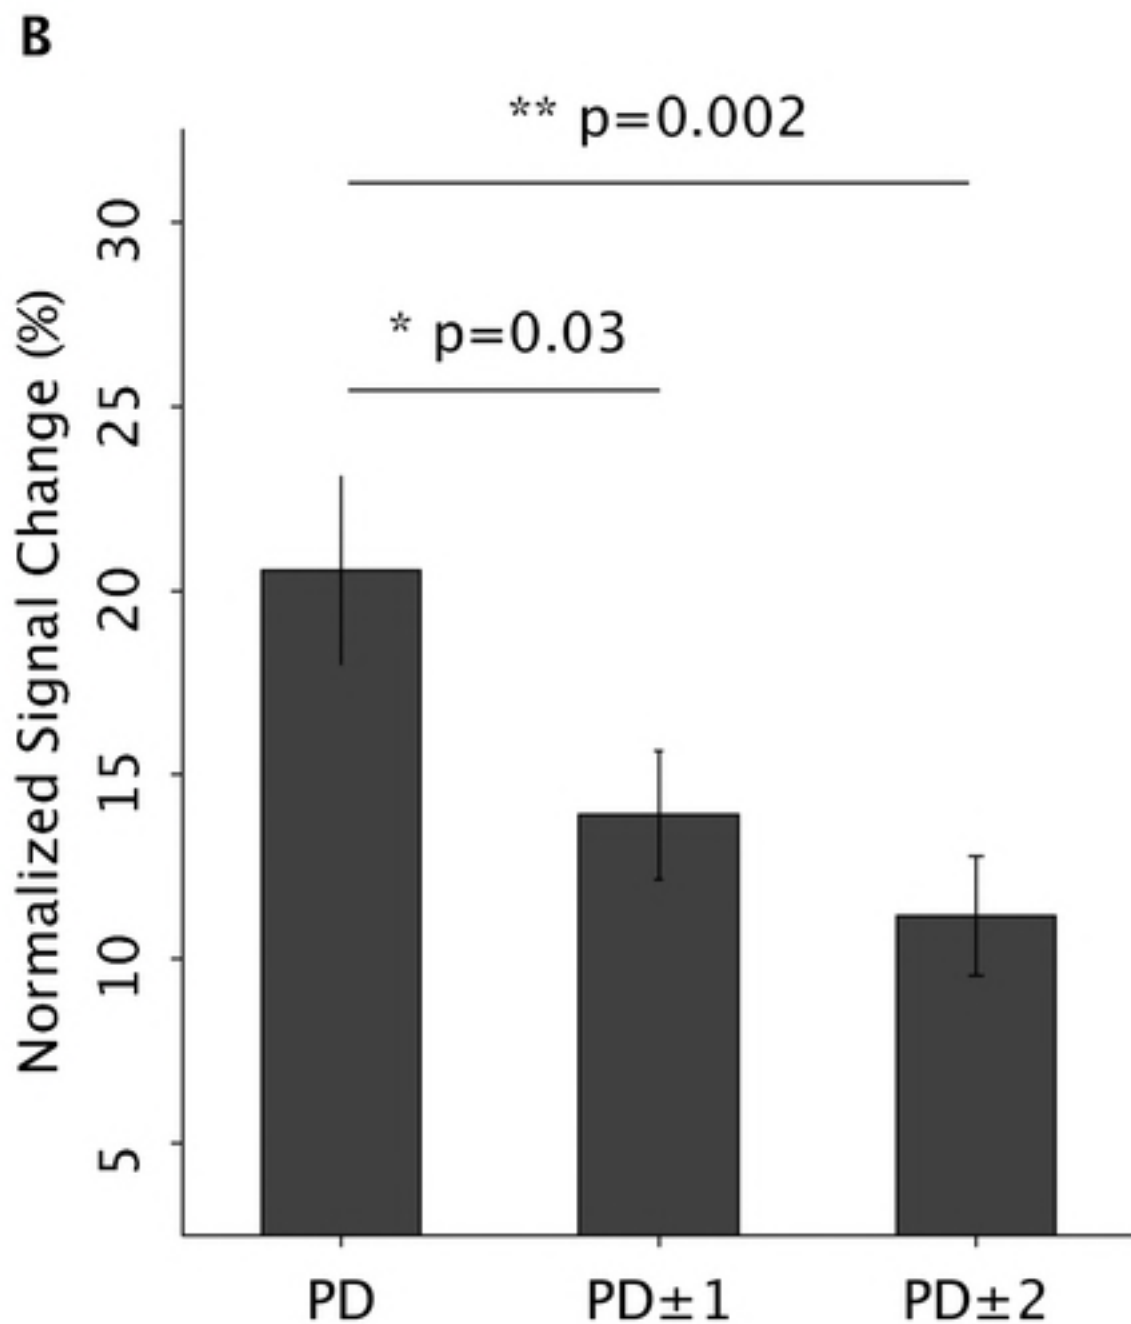

**A**

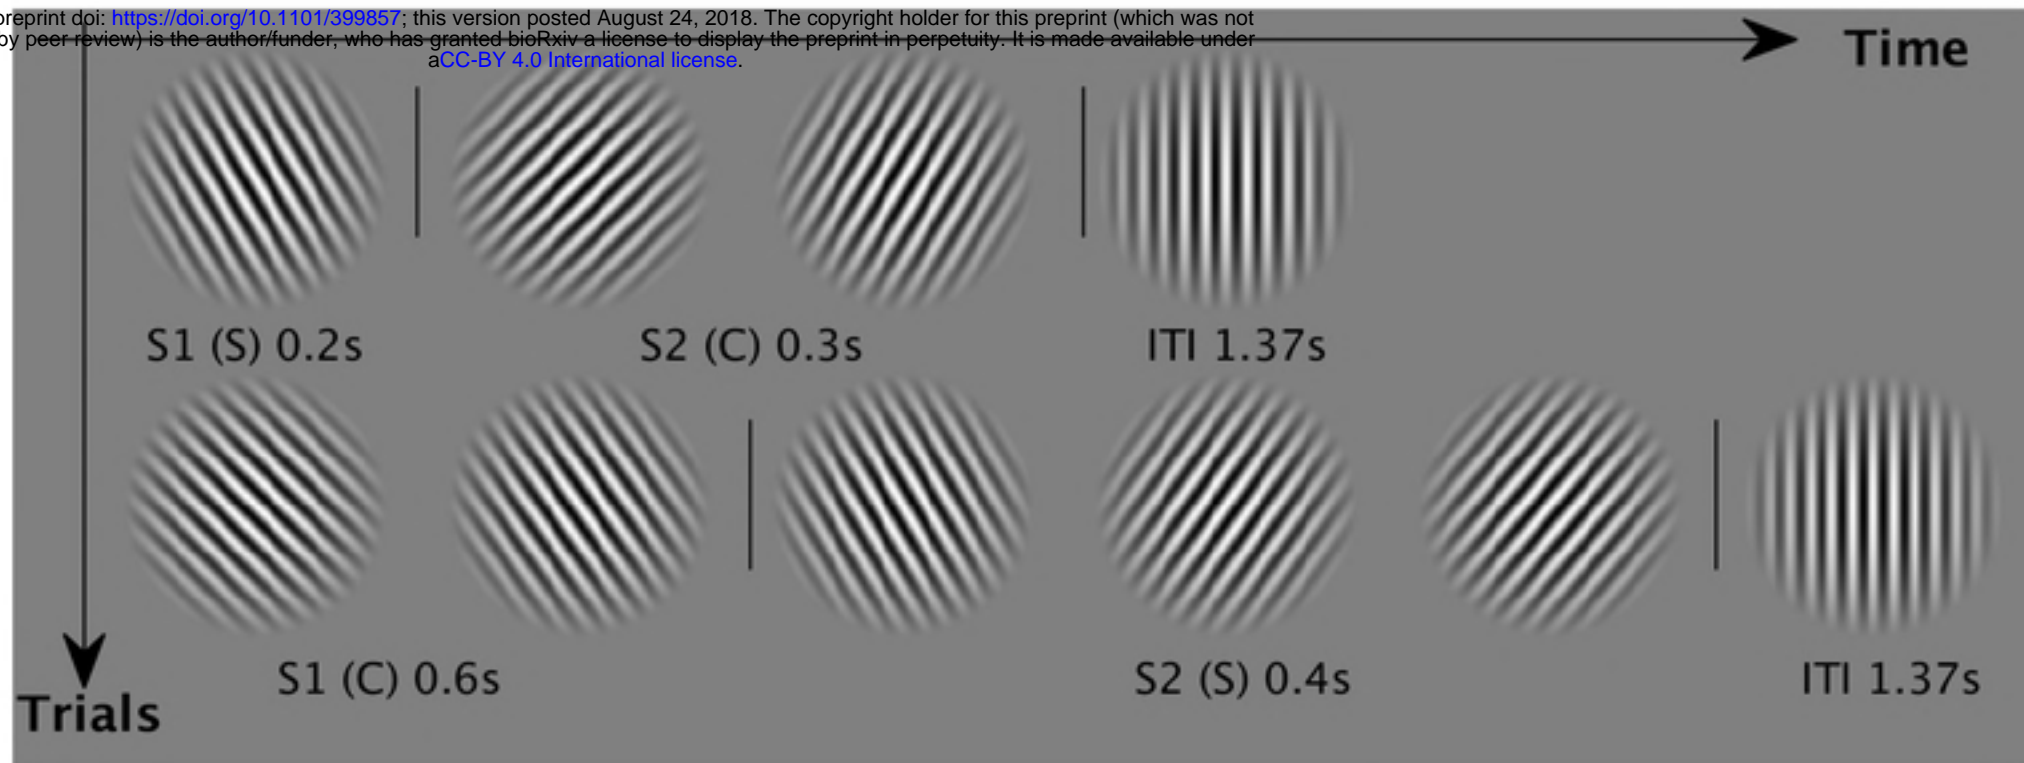

**B**

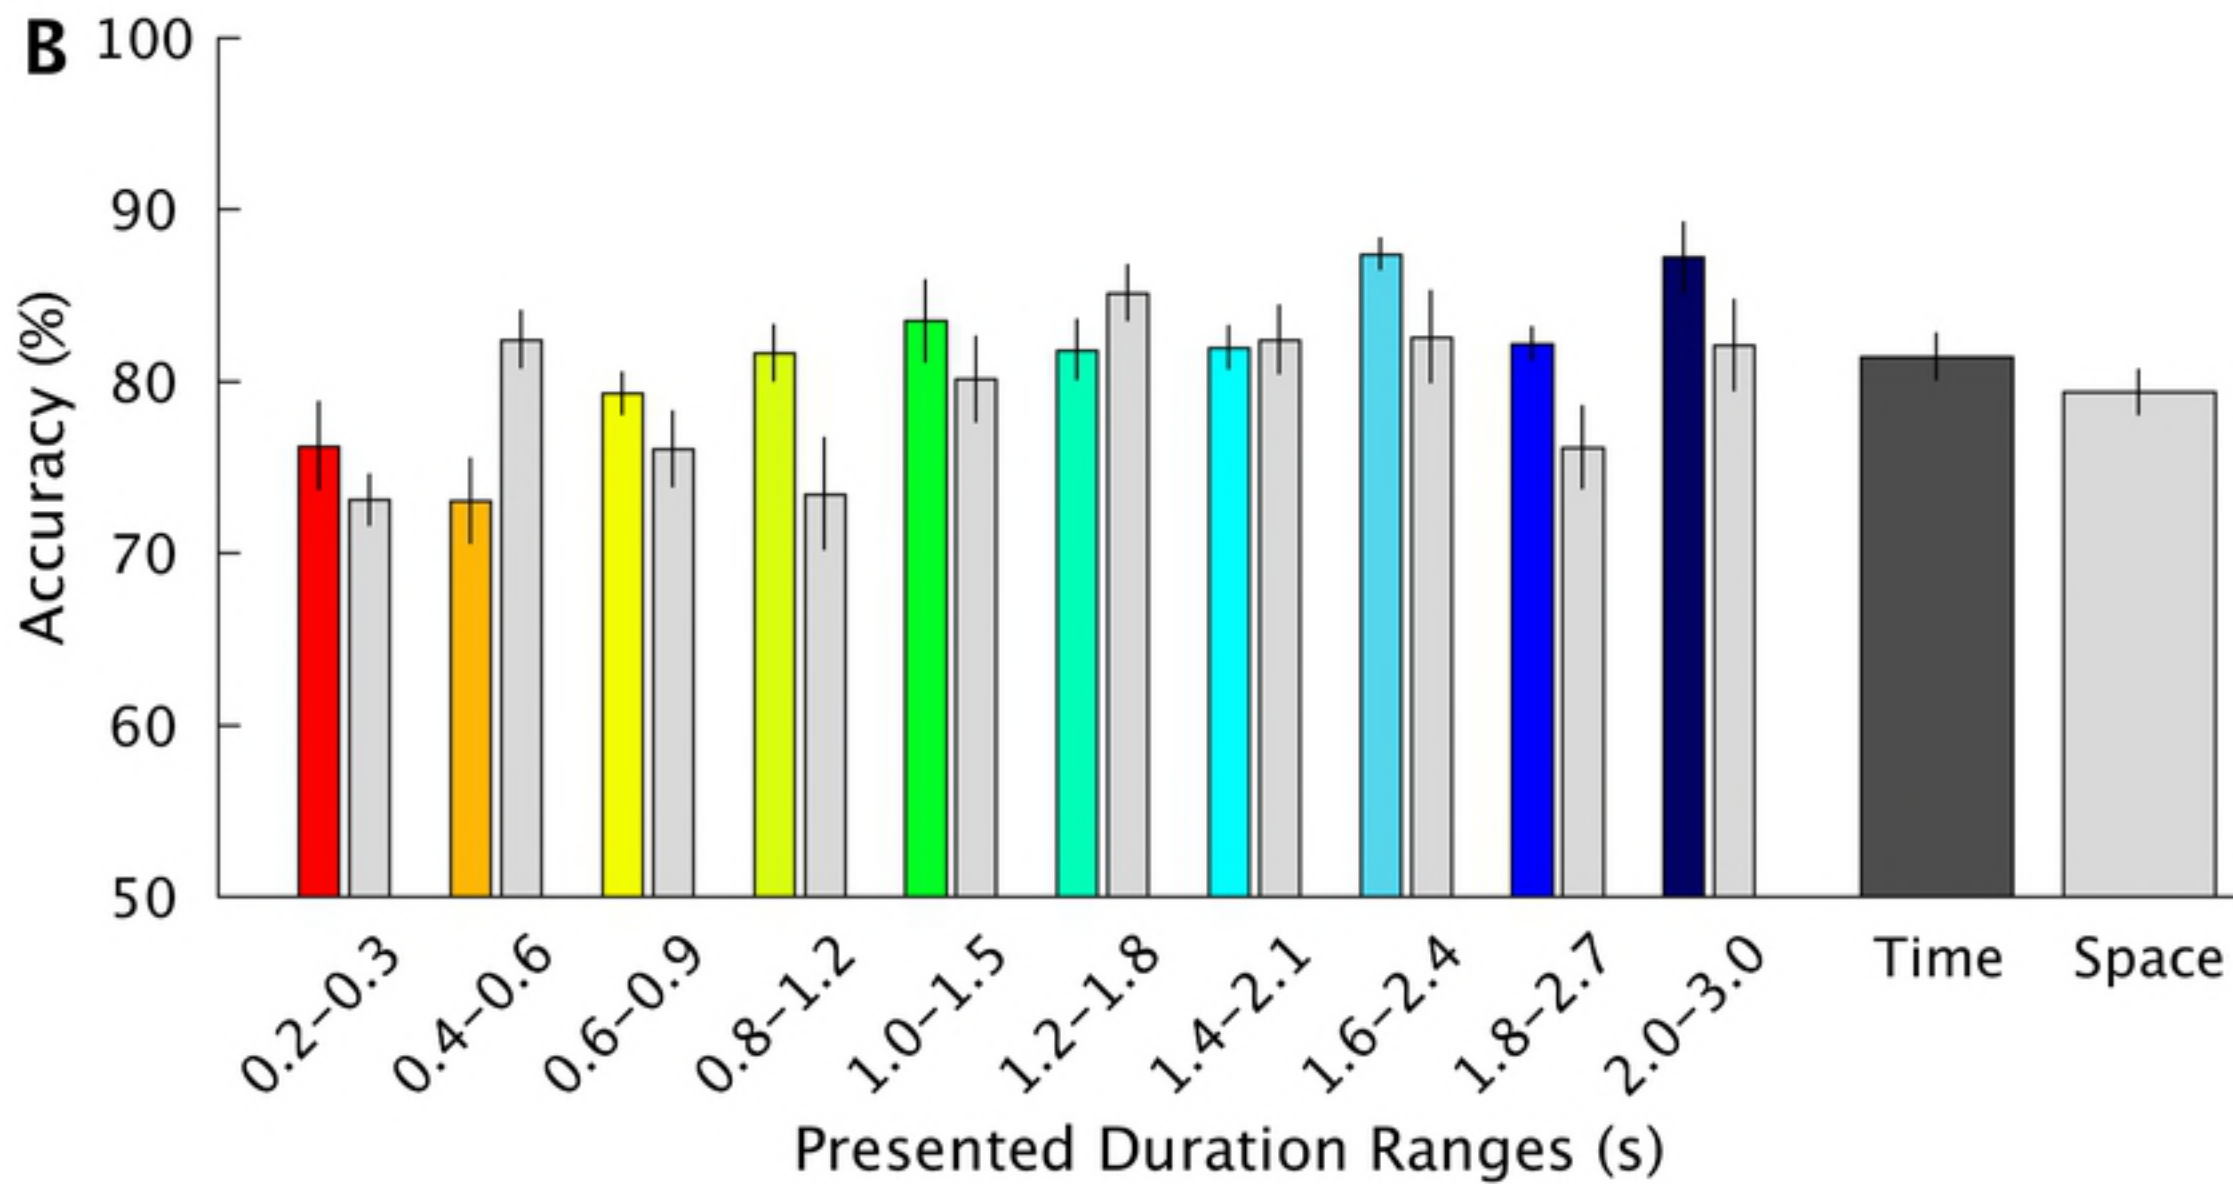

Time-maps in time-task

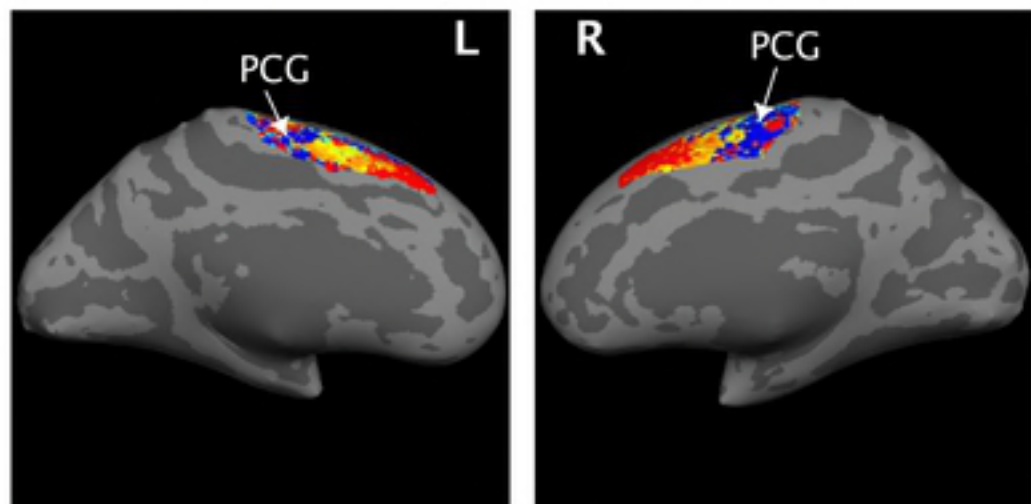

Time-maps in space-task

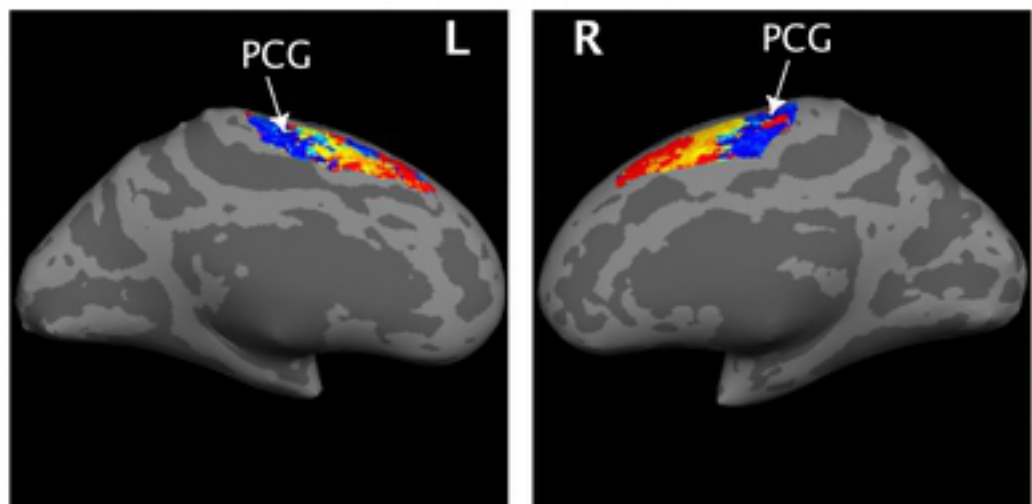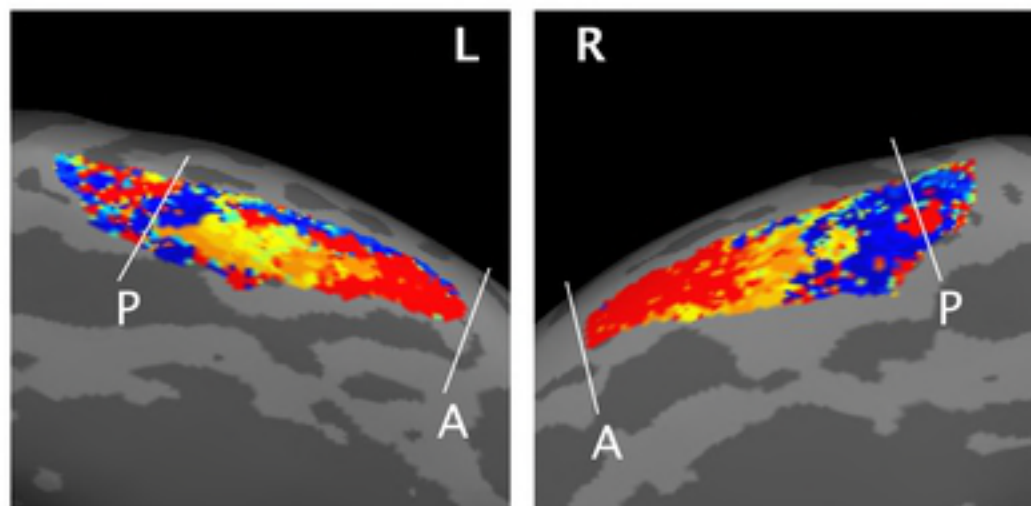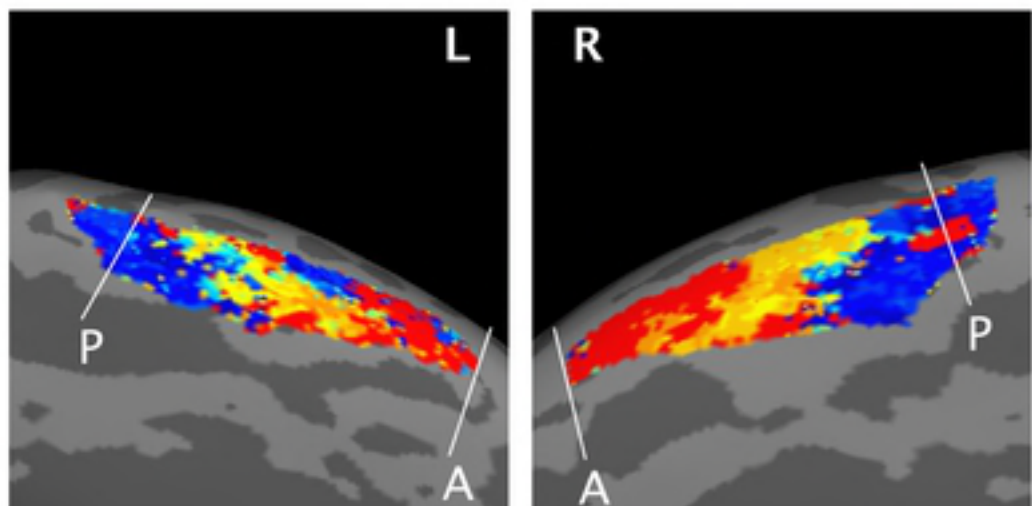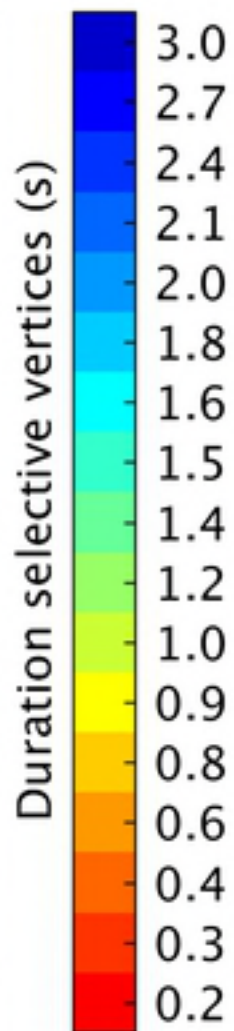

Duration-selective vertices (s)

0.2 0.3 0.4 0.6 0.8 0.9 1.0 1.2 1.4 1.5 1.6 1.8 2.0 2.1 2.4 2.7 3.0

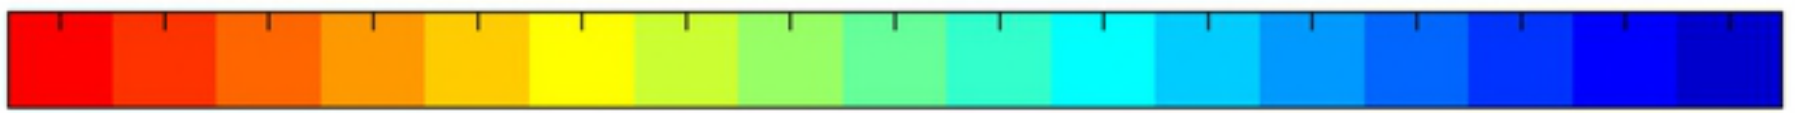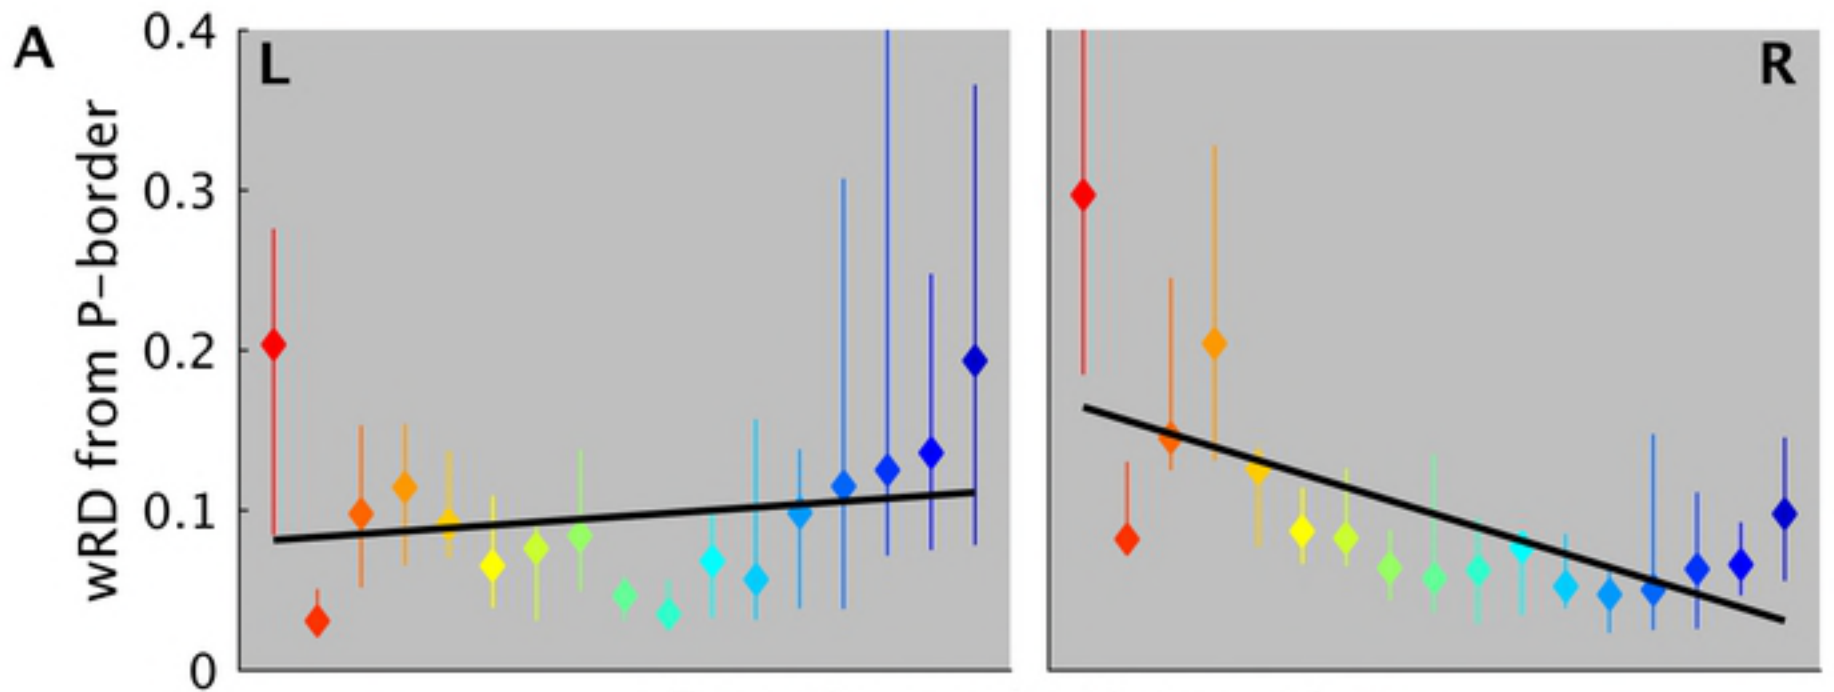

bioRxiv preprint doi: <https://doi.org/10.1101/399857>; this version posted August 24, 2018. The copyright holder for this preprint (which was not certified by peer review) is the author/funder, who has granted bioRxiv a license to display the preprint in perpetuity. It is made available under aCC-BY 4.0 International license.

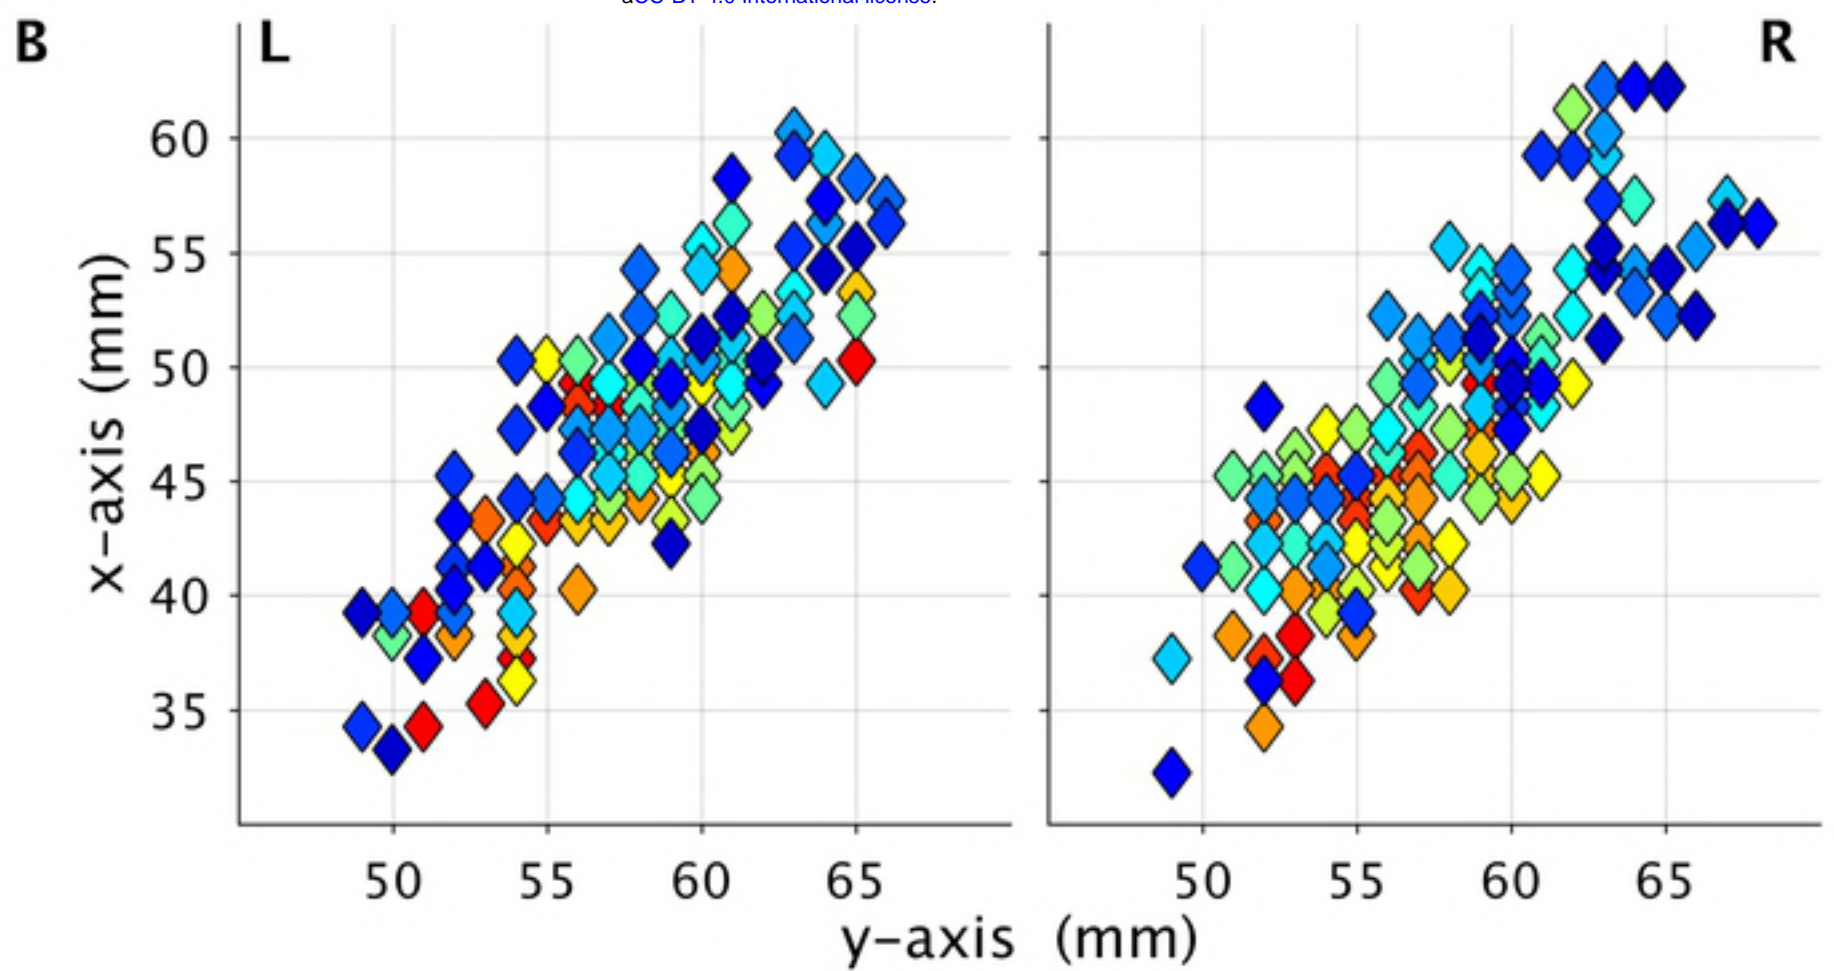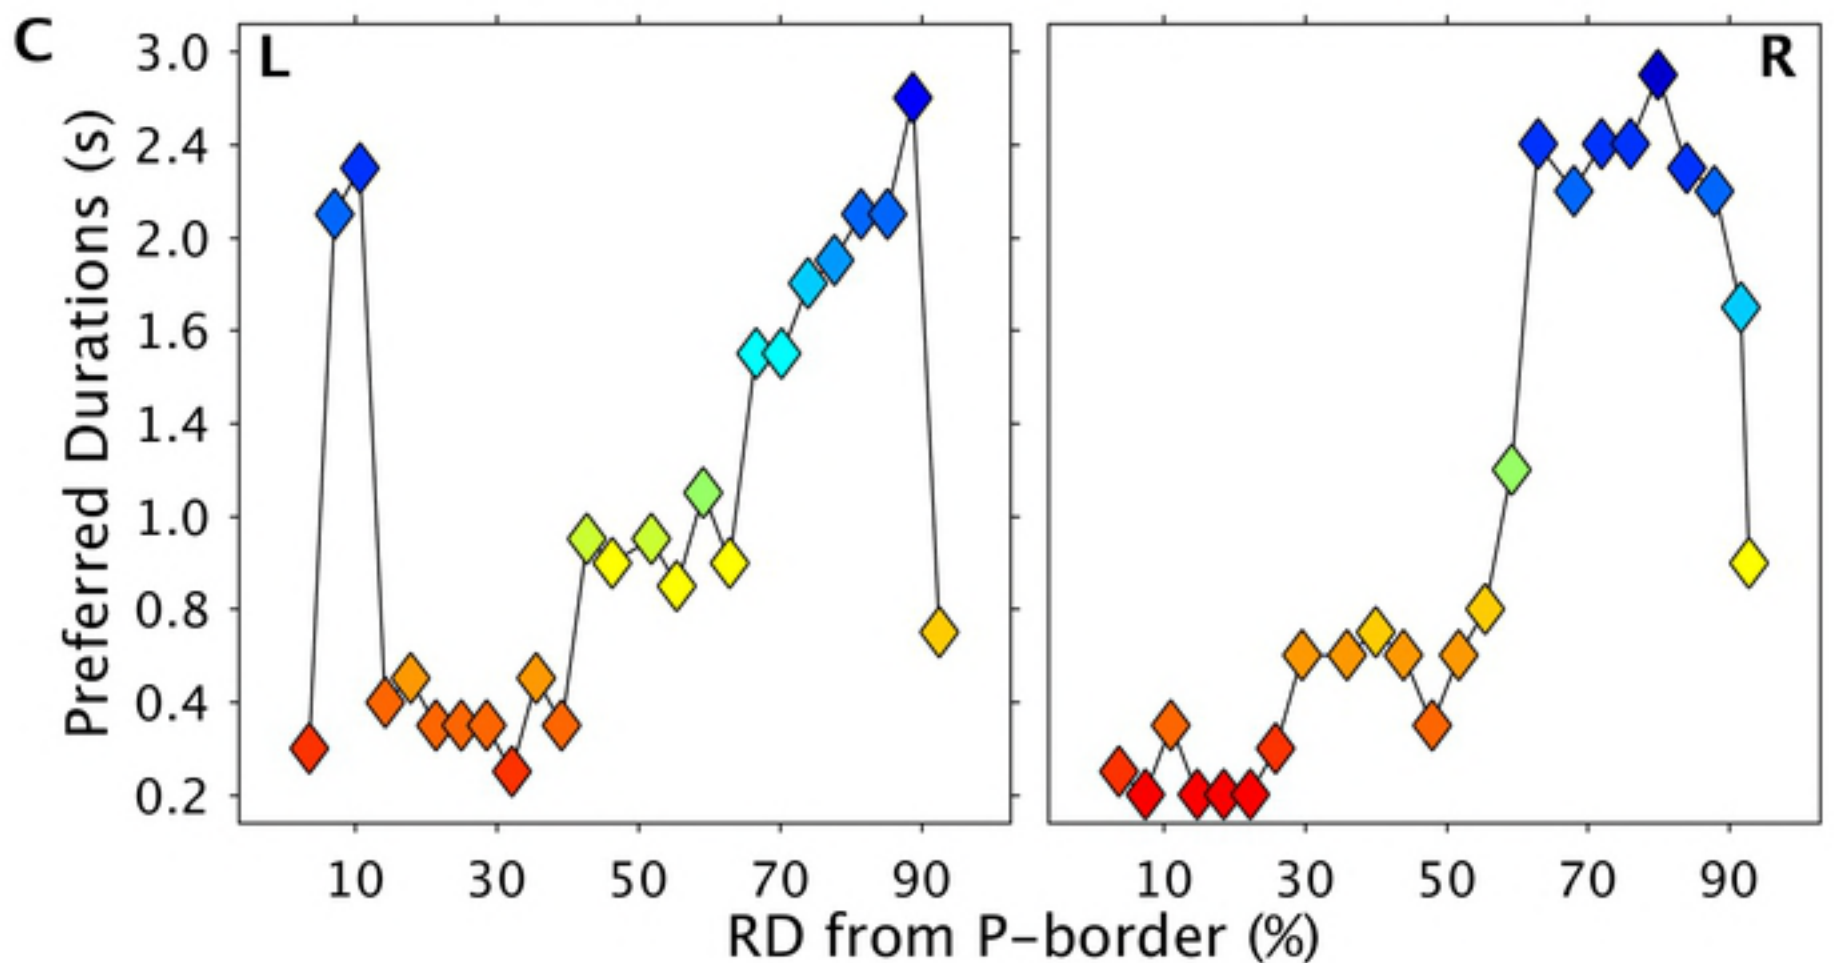

Duration-selective vertices (s)

0.2 0.3 0.4 0.6 0.8 0.9 1.0 1.2 1.4 1.5 1.6 1.8 2.0 2.1 2.4 2.7 3.0

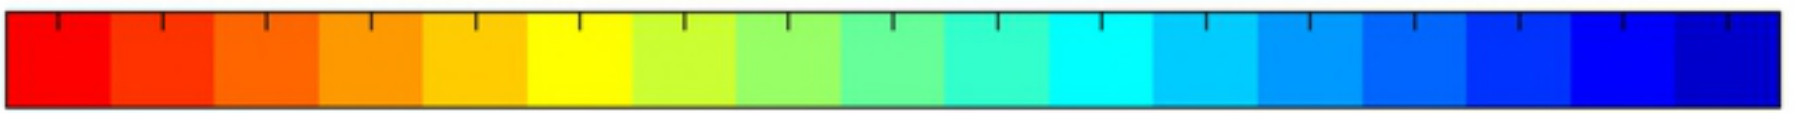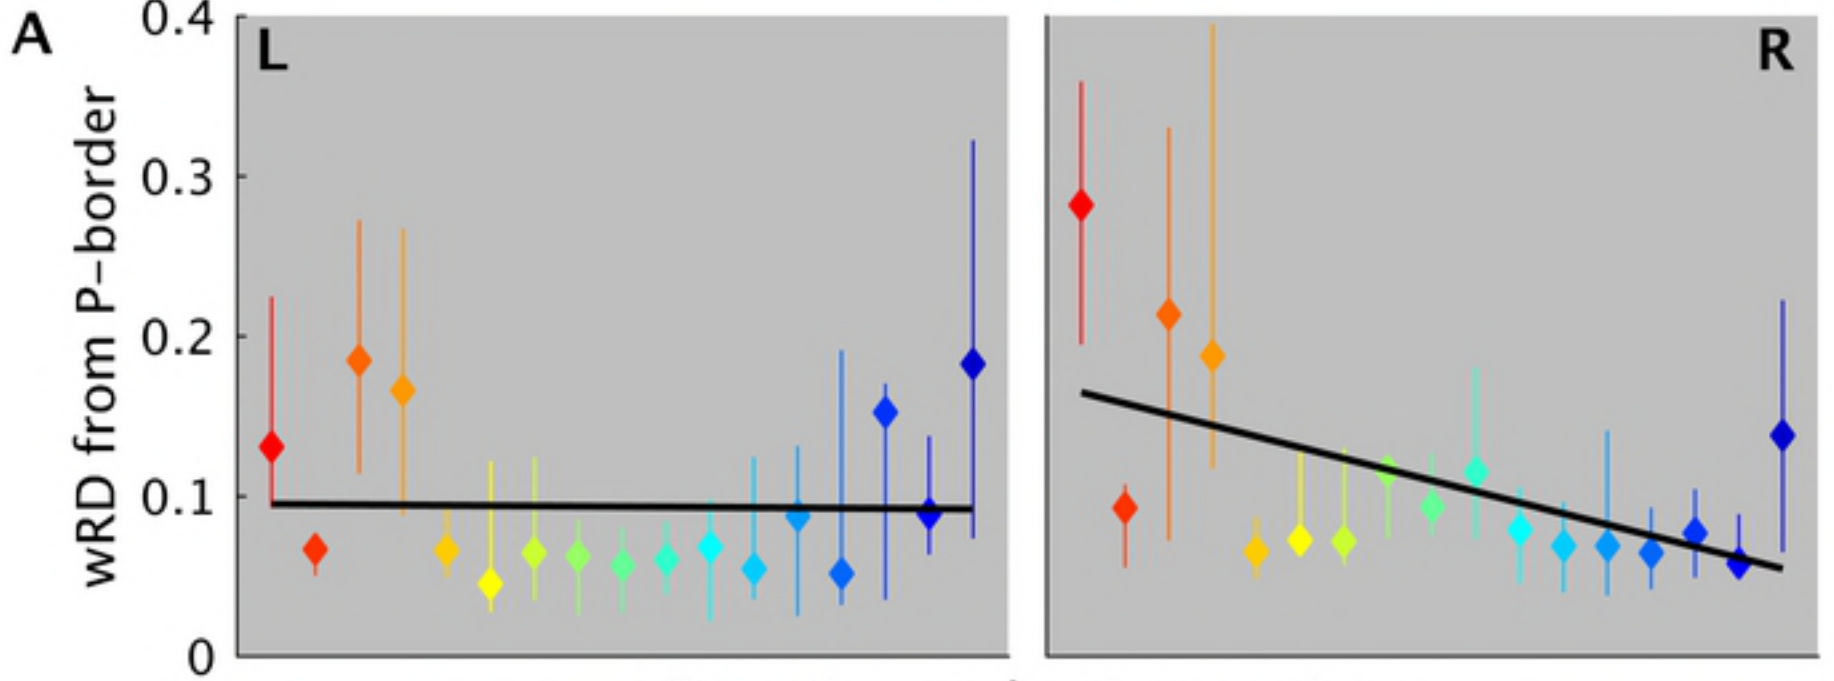

bioRxiv preprint doi: <https://doi.org/10.1101/399857>; this version posted August 24, 2018. The copyright holder for this preprint (which was not certified by peer review) is the author/funder, who has granted bioRxiv a license to display the preprint in perpetuity. It is made available under aCC-BY 4.0 International license.

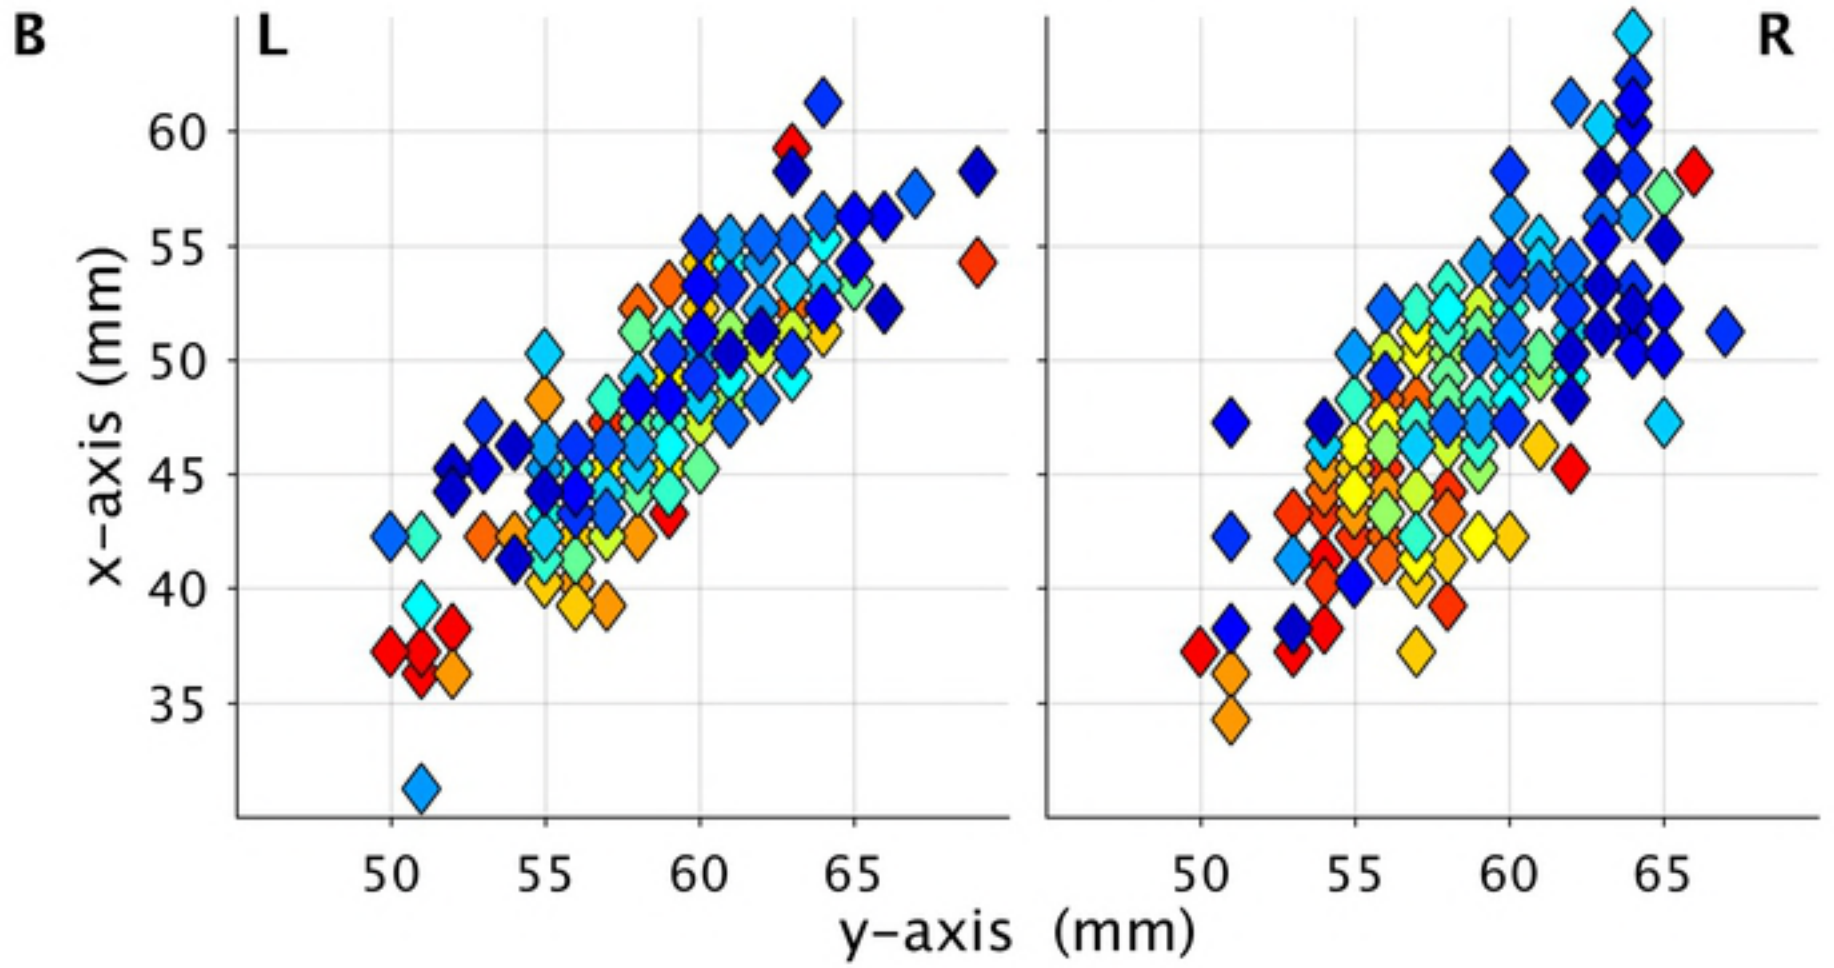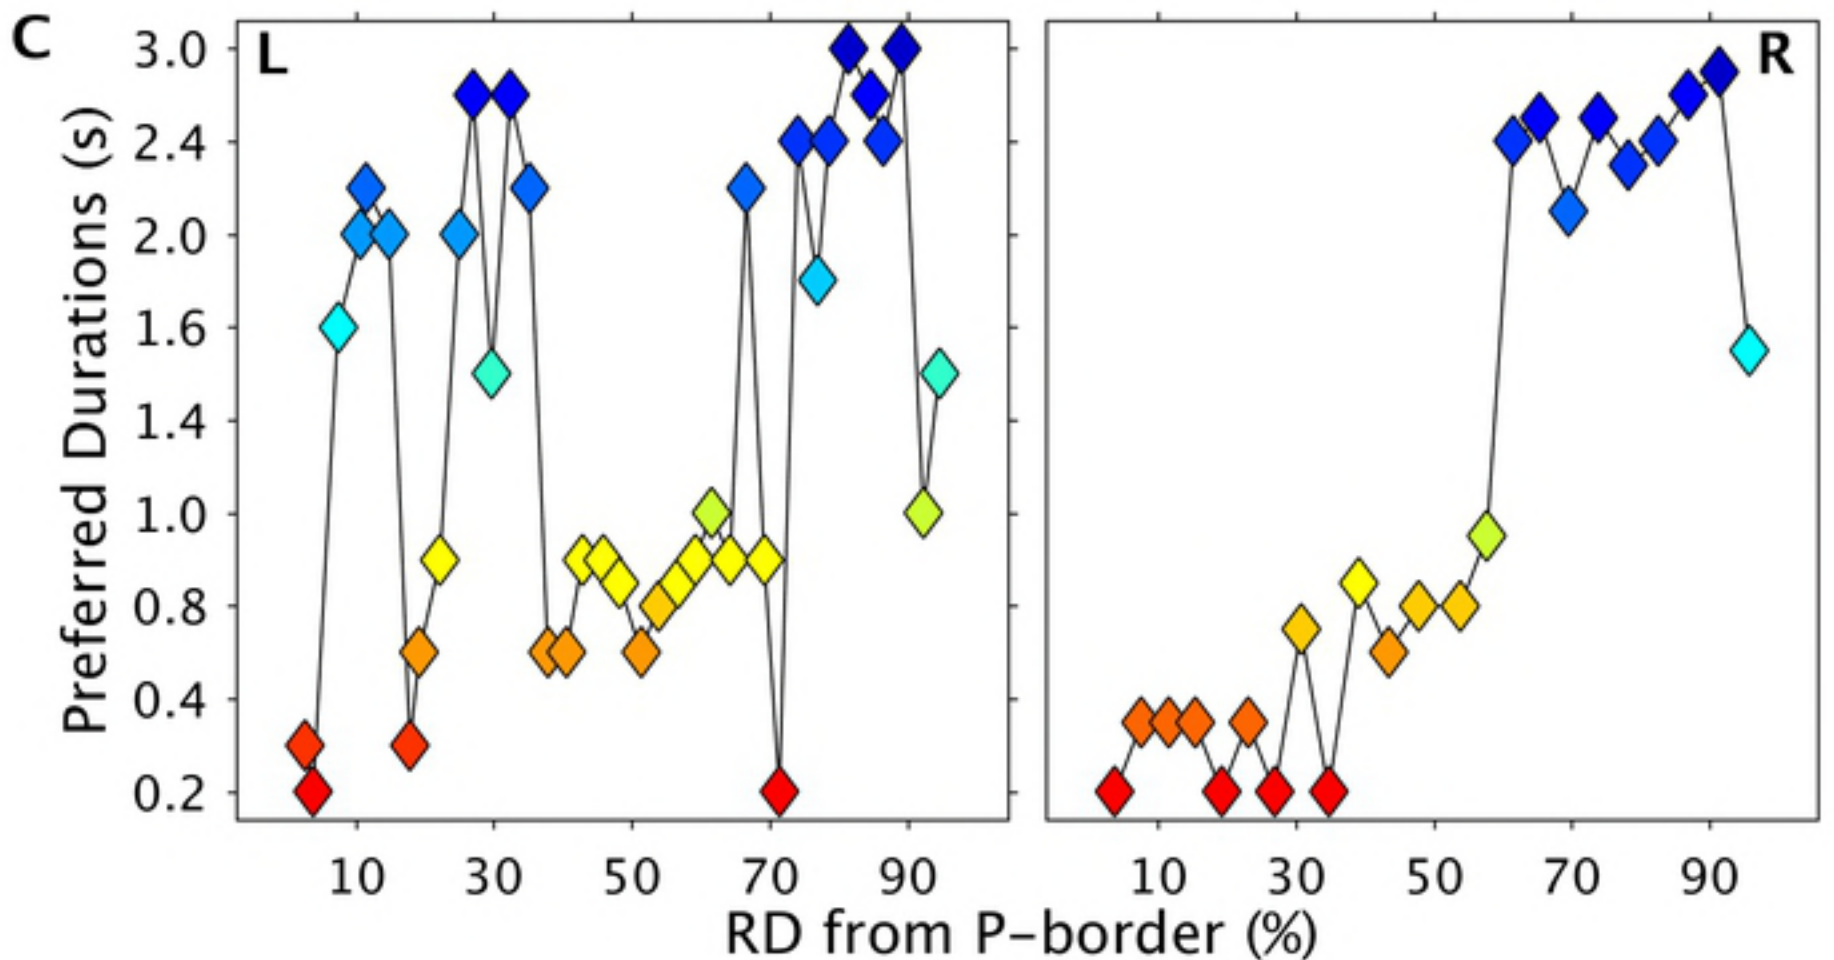

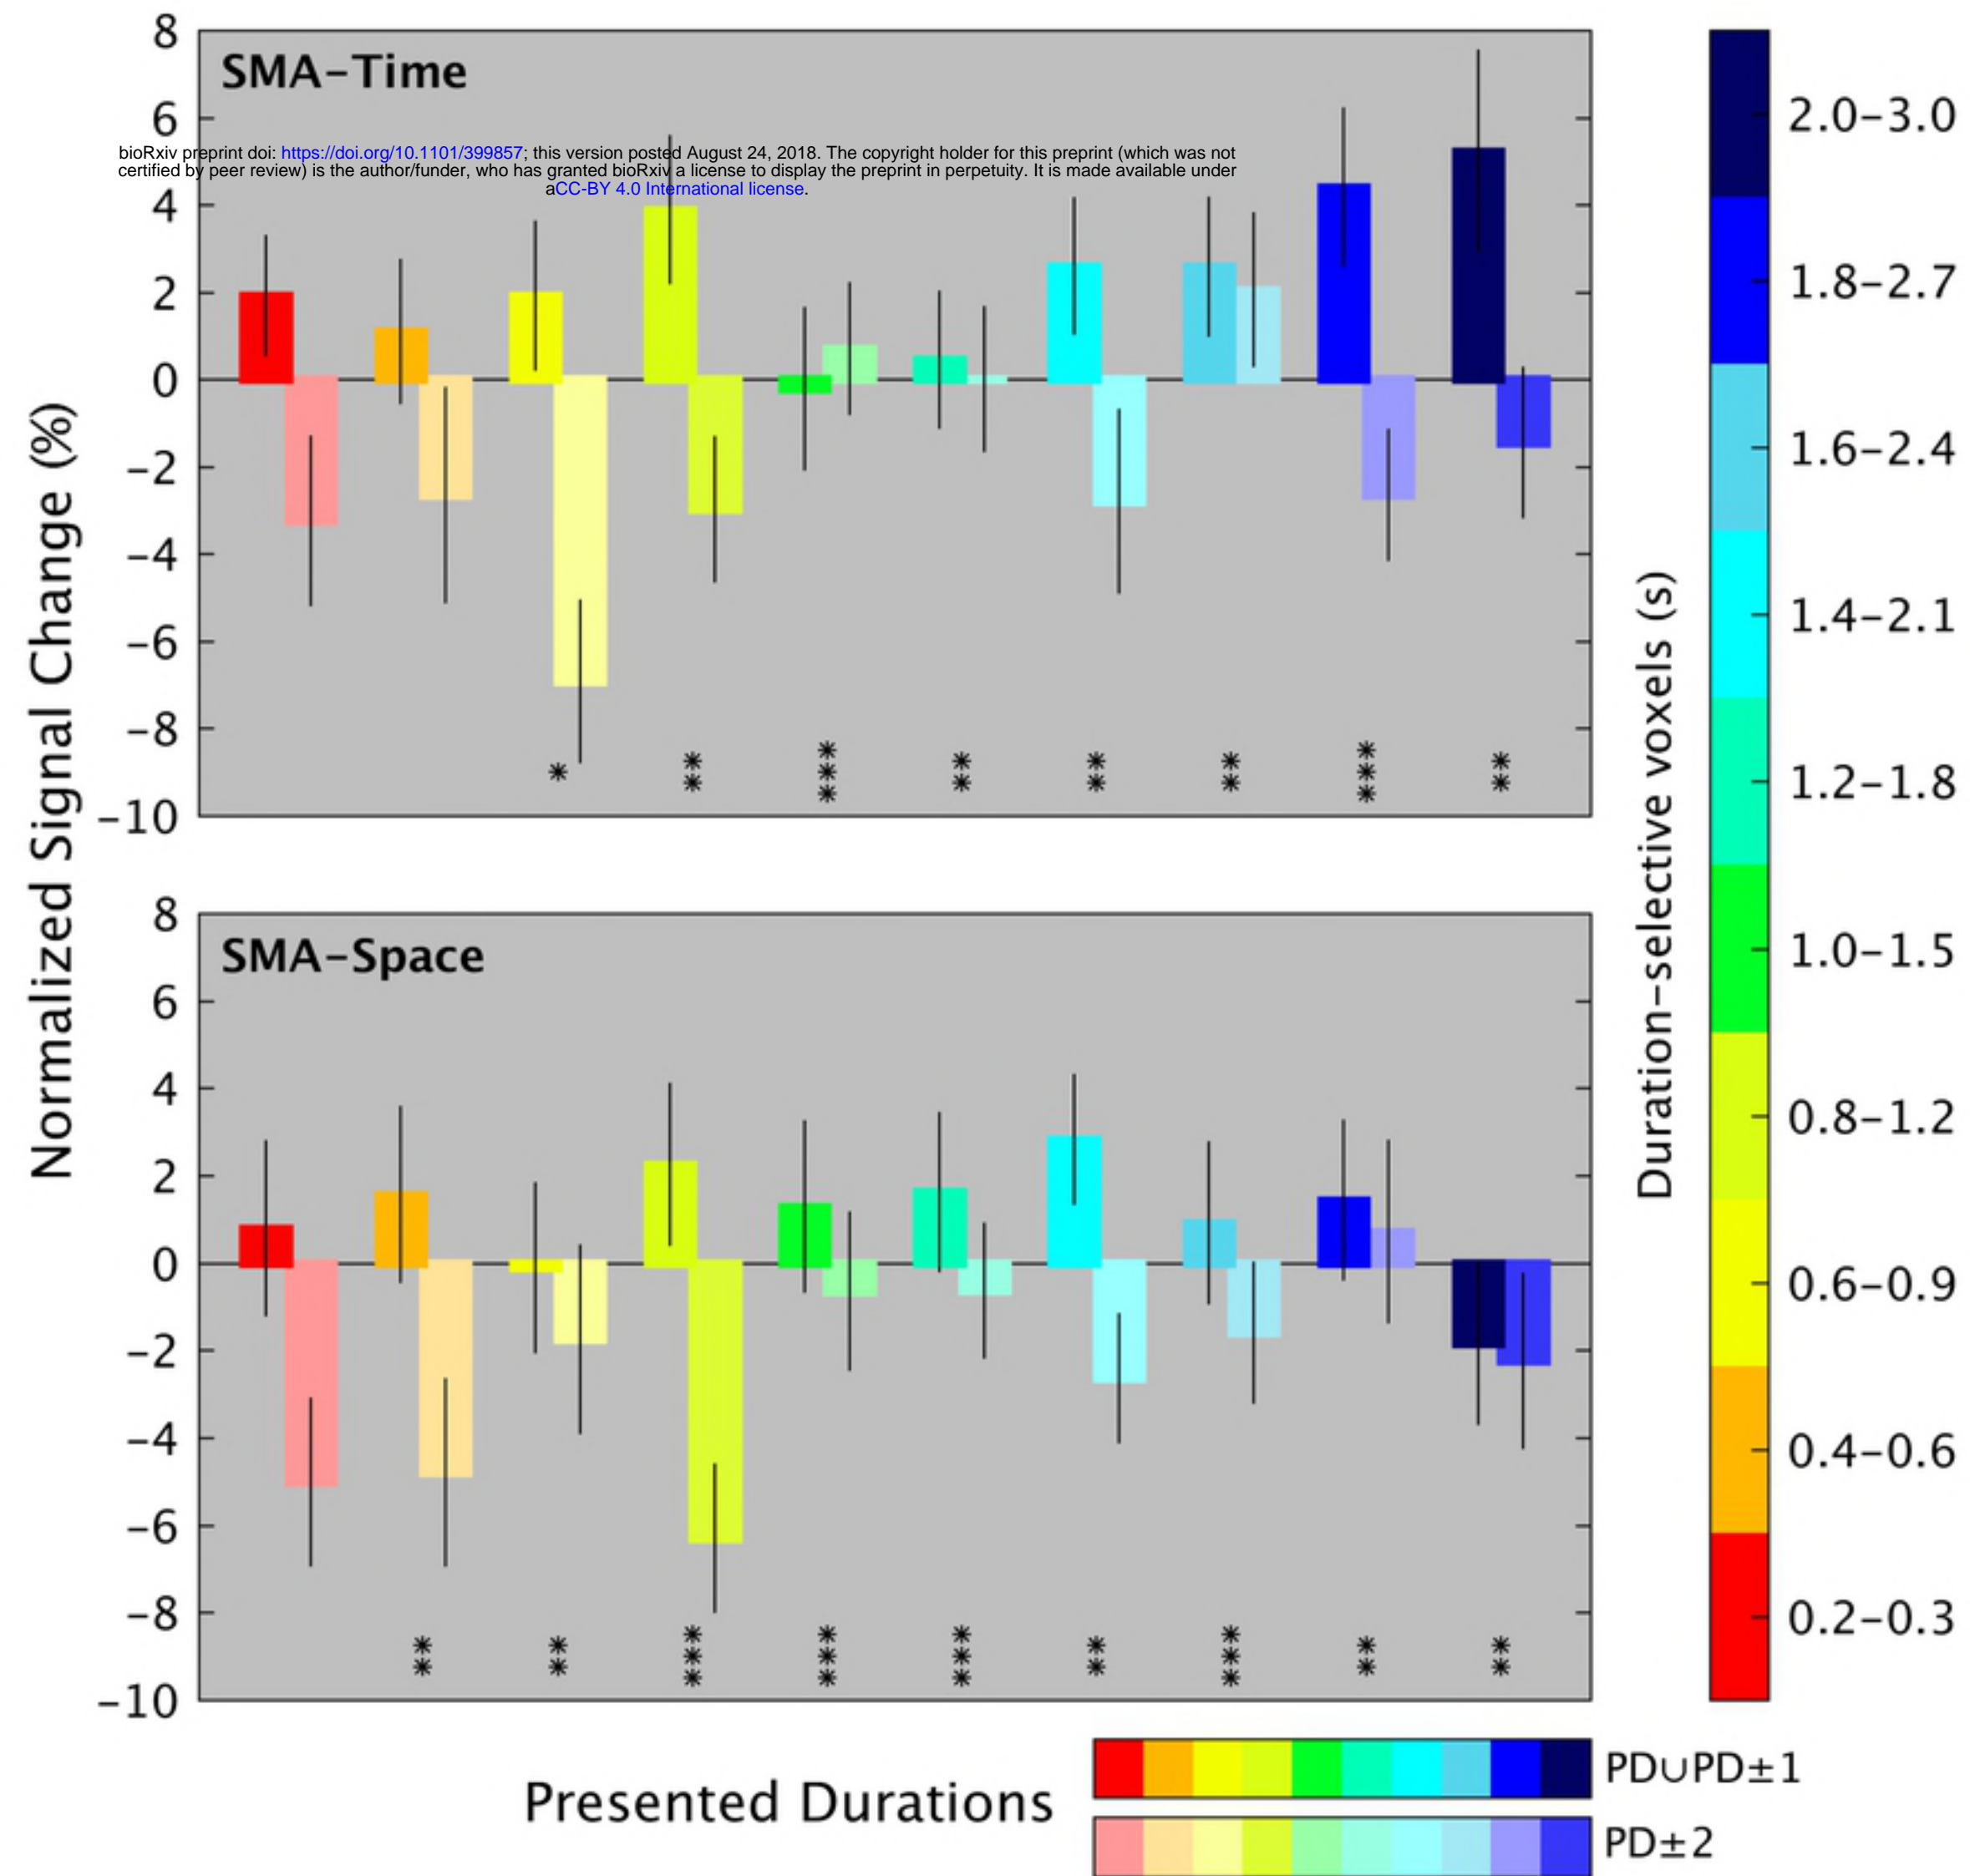

# A Time-maps in time-task

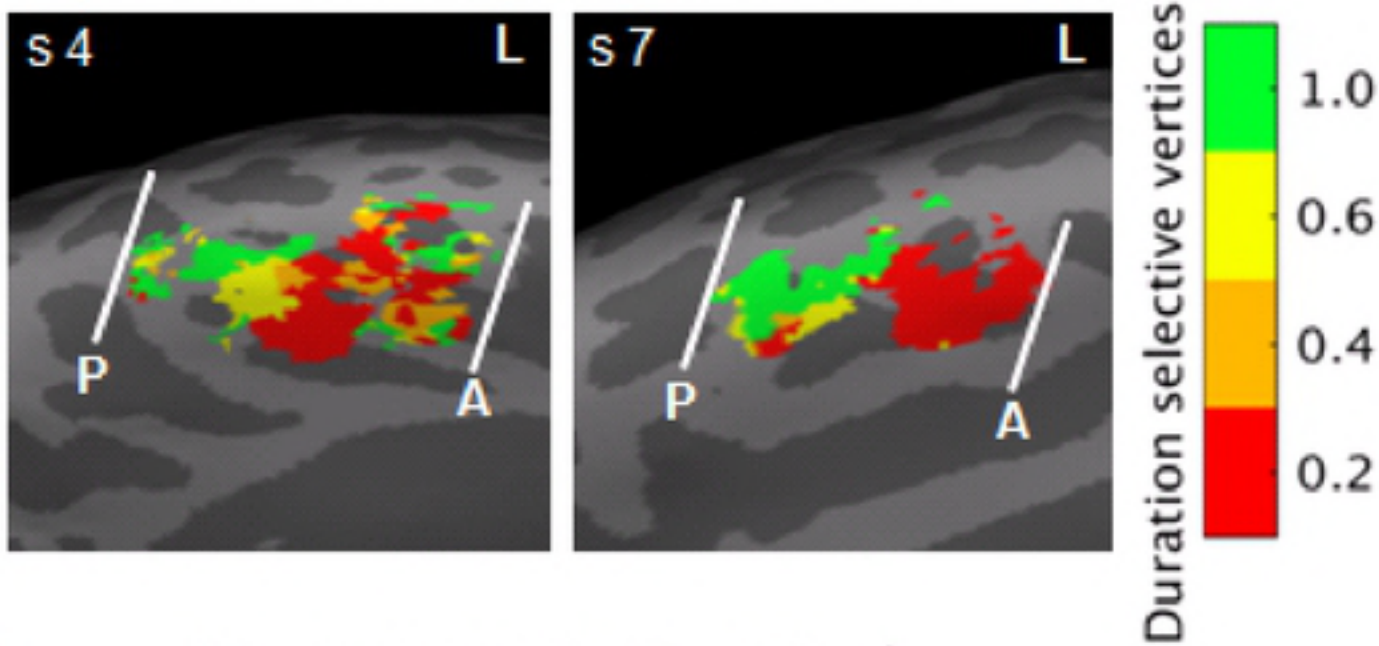

# B Time-maps in time-task

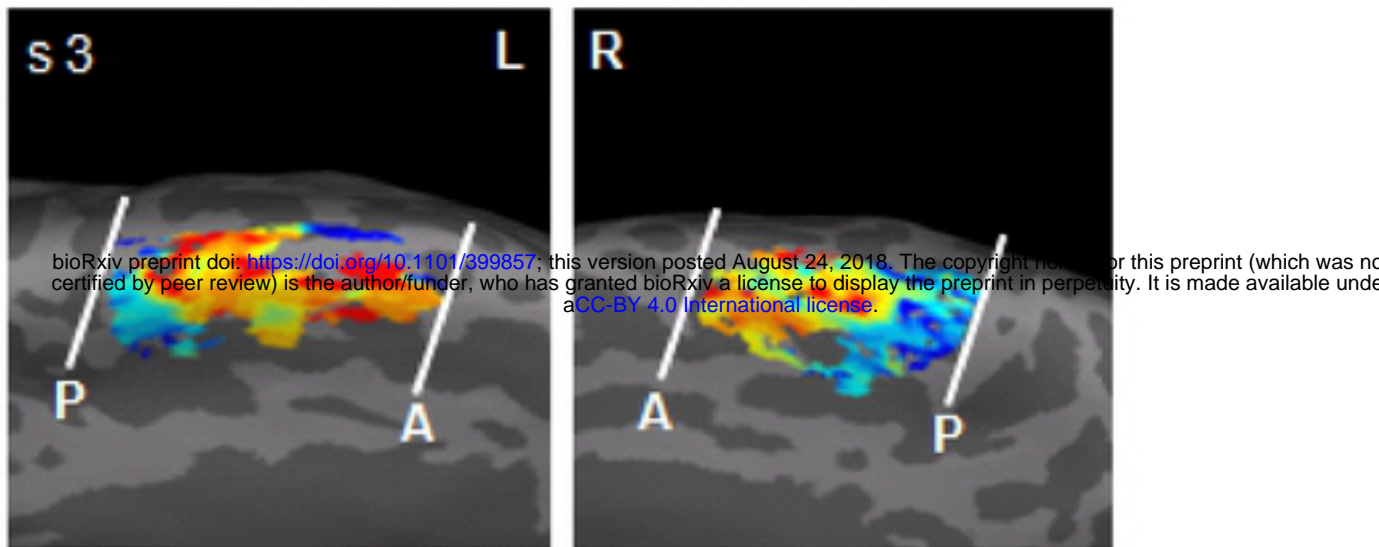

bioRxiv preprint doi: <https://doi.org/10.1101/399857>; this version posted August 24, 2018. The copyright holder for this preprint (which was not certified by peer review) is the author/funder, who has granted bioRxiv a license to display the preprint in perpetuity. It is made available under aCC-BY 4.0 International license.

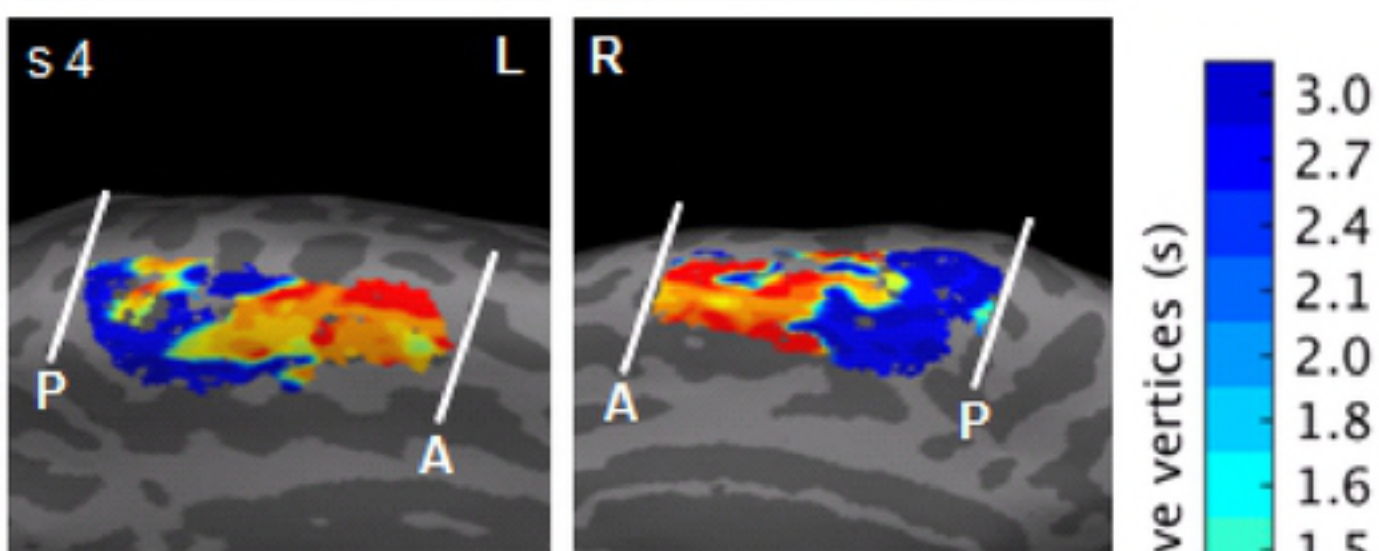

# Time-maps in space-task

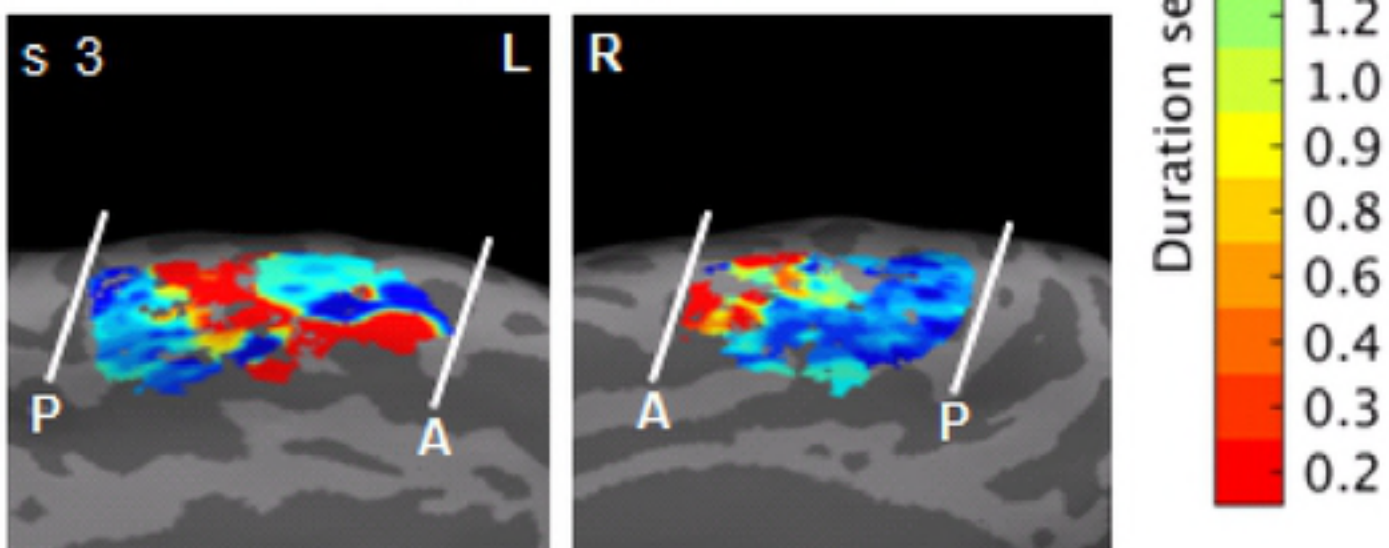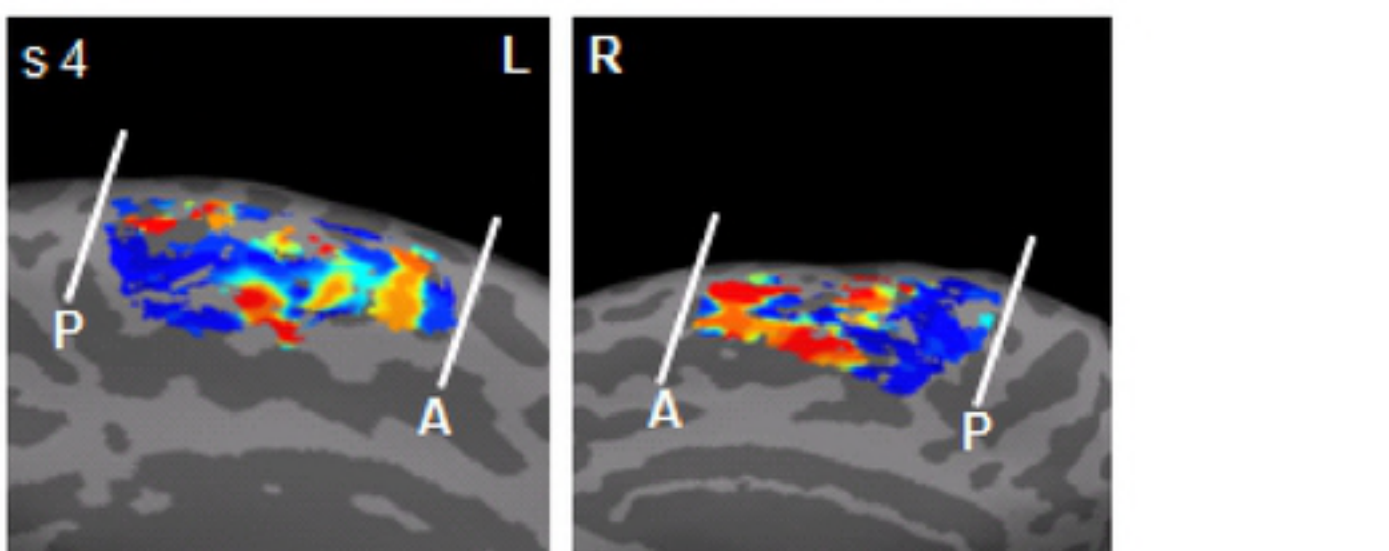

Source: https://www.biorxiv.org/content/10.1101/399857v1.full.pdf
